# Supplementary material for: Temporal Genetic Modifications after Controlled Cortical Impact—Understanding Traumatic Brain Injury through a Systematic Network Approach
Source: Int J Mol Sci. 2016 Feb 6;17(2):216. doi: 10.3390/ijms17020216 (PMC4783948; doi:10.3390/ijms17020216)
Supplement: Supplementary file 1 [file ijms-17-00216-s001.zip]

Archive with 4 entries (3 files):
- ijms-105508-Supplementary Materials/
- ijms-105508-Supplementary Materials/ijms-105508-Supplementary S3.xlsx
- ijms-105508-Supplementary Materials/ijms-105508-Supplementary-S5.xls
- ijms-105508-Supplementary Materials/ijms-105508-supplementary.pdf
