# Supplementary material for: Temporal Genetic Modifications after Controlled Cortical Impact—Understanding Traumatic Brain Injury through a Systematic Network Approach
Source: Int J Mol Sci. 2016 Feb 6;17(2):216. doi: 10.3390/ijms17020216 (PMC4783948; doi:10.3390/ijms17020216)
Supplement: Supplementary file 1 [file ijms-17-00216-s001.zip › ijms-105508-Supplementary Materials/ijms-105508-Supplementary S3.xlsx]

## Sheet: David_Ori_4 h
Table S1. David (4 h).
Annotation Cluster 1	Enrichment Score: 4.279448177390746
Category	Term	Count	%	p Value	Genes	List Total	Pop Hits	Pop Total	Fold Enrichment	Bonferroni	Benjamini	FDR
INTERPRO	IPR000626:Ubiquitin	6	2.43902	1.44936e-09	SUMO3, SUMO1, UBC, UBD, NEDD8, PARK2	20	46	16659	108.646	1.10151e-07	1.10151e-07	1.52516e-06
SMART	SM00213:UBQ	6	2.43902	1.57878e-08	SUMO3, SUMO1, UBC, UBD, NEDD8, PARK2	18	46	9079	65.7899	3.47331e-07	3.47331e-07	1.2356e-05
GOTERM_BP_FAT	GO:0032446~protein modification by small protein conjugation	7	2.84553	1.88238e-08	SUMO3, SUMO1, NEDD4, UBC, NEDD8, PARK2, BRCA1	20	132	13528	35.8697	1.1106e-05	1.1106e-05	2.77374e-05
GOTERM_BP_FAT	GO:0070647~protein modification by small protein conjugation or removal	7	2.84553	5.95326e-08	SUMO3, SUMO1, NEDD4, UBC, NEDD8, PARK2, BRCA1	20	160	13528	29.5925	3.51236e-05	1.7562e-05	8.77229e-05
UP_SEQ_FEATURE	cross-link:Glycyl lysine isopeptide (Gly-Lys) (interchain with K-? in acceptor proteins)	4	1.62602	1.36728e-07	SUMO3, SUMO1, UBC, NEDD8	20	11	19113	347.509	2.09192e-05	2.09192e-05	0.000163835
INTERPRO	IPR019955:Ubiquitin supergroup	5	2.03252	3.15974e-07	SUMO3, SUMO1, UBC, NEDD8, PARK2	20	52	16659	80.0913	2.40138e-05	1.2007e-05	0.0003325
SP_PIR_KEYWORDS	ubl conjugation pathway	7	2.84553	6.74595e-06	SUMO3, SUMO1, NEDD4, UBD, NEDD8, PARK2, BRCA1	20	509	19235	13.2264	0.000782226	0.000782226	0.00769606
GOTERM_BP_FAT	GO:0043632~modification-dependent macromolecule catabolic process	8	3.25203	7.70161e-06	SUMO3, SUMO1, NEDD4, UBC, UBD, NEDD8, PARK2, BRCA1	20	574	13528	9.42718	0.00453366	0.00151351	0.0113479
GOTERM_BP_FAT	GO:0019941~modification-dependent protein catabolic process	8	3.25203	7.70161e-06	SUMO3, SUMO1, NEDD4, UBC, UBD, NEDD8, PARK2, BRCA1	20	574	13528	9.42718	0.00453366	0.00151351	0.0113479
GOTERM_BP_FAT	GO:0051603~proteolysis involved in cellular protein catabolic process	8	3.25203	1.03016e-05	SUMO3, SUMO1, NEDD4, UBC, UBD, NEDD8, PARK2, BRCA1	20	600	13528	9.01867	0.00605952	0.00151833	0.0151786
GOTERM_BP_FAT	GO:0044257~cellular protein catabolic process	8	3.25203	1.06438e-05	SUMO3, SUMO1, NEDD4, UBC, UBD, NEDD8, PARK2, BRCA1	20	603	13528	8.9738	0.0062602	0.00125519	0.0156828
GOTERM_BP_FAT	GO:0030163~protein catabolic process	8	3.25203	1.30393e-05	SUMO3, SUMO1, NEDD4, UBC, UBD, NEDD8, PARK2, BRCA1	20	622	13528	8.69968	0.0076637	0.00128138	0.019212
GOTERM_BP_FAT	GO:0044265~cellular macromolecule catabolic process	8	3.25203	3.52514e-05	SUMO3, SUMO1, NEDD4, UBC, UBD, NEDD8, PARK2, BRCA1	20	725	13528	7.46372	0.0205839	0.00296683	0.0519314
GOTERM_BP_FAT	GO:0009057~macromolecule catabolic process	8	3.25203	5.6835e-05	SUMO3, SUMO1, NEDD4, UBC, UBD, NEDD8, PARK2, BRCA1	20	781	13528	6.92855	0.0329776	0.00418293	0.0837153
INTERPRO	IPR019956:Ubiquitin subgroup	3	1.21951	6.73685e-05	UBC, UBD, NEDD8	20	11	16659	227.168	0.0051071	0.00170527	0.0708692
GOTERM_BP_FAT	GO:0006508~proteolysis	8	3.25203	0.000373515	SUMO3, SUMO1, NEDD4, UBC, UBD, NEDD8, PARK2, BRCA1	20	1054	13528	5.13397	0.197814	0.0182003	0.548975
GOTERM_BP_FAT	GO:0016567~protein ubiquitination	4	1.62602	0.000580255	NEDD4, UBC, PARK2, BRCA1	20	119	13528	22.7361	0.289971	0.0259984	0.851622
INTERPRO	IPR019954:Ubiquitin conserved site	3	1.21951	0.000676494	UBC, NEDD8, PARK2	20	34	16659	73.4956	0.0501308	0.0127754	0.709587
UP_SEQ_FEATURE	domain:Ubiquitin-like	3	1.21951	0.00078722	SUMO3, SUMO1, PARK2	20	42	19113	68.2607	0.113516	0.0393682	0.939224
GOTERM_MF_FAT	GO:0019787~small conjugating protein ligase activity	4	1.62602	0.00101709	SUMO3, NEDD4, PARK2, BRCA1	17	166	12983	18.4026	0.114951	0.0592298	1.16135
GOTERM_MF_FAT	GO:0016881~acid-amino acid ligase activity	4	1.62602	0.00176425	SUMO3, NEDD4, PARK2, BRCA1	17	201	12983	15.1981	0.190952	0.0681955	2.00662
GOTERM_MF_FAT	GO:0016879~ligase activity, forming carbon-nitrogen bonds	4	1.62602	0.00262328	SUMO3, NEDD4, PARK2, BRCA1	17	231	12983	13.2243	0.270363	0.075777	2.9703
SP_PIR_KEYWORDS	isopeptide bond	4	1.62602	0.00359543	SUMO3, SUMO1, UBC, NEDD8	20	319	19235	12.0596	0.34152	0.0801681	4.02607
GOTERM_BP_FAT	GO:0006511~ubiquitin-dependent protein catabolic process	4	1.62602	0.00443251	NEDD4, UBC, NEDD8, PARK2	20	242	13528	11.1802	0.927269	0.128855	6.33629
GOTERM_MF_FAT	GO:0004842~ubiquitin-protein ligase activity	3	1.21951	0.0137705	NEDD4, PARK2, BRCA1	17	147	12983	15.5858	0.81061	0.283079	14.7153
SP_PIR_KEYWORDS	ligase	3	1.21951	0.0358816	NEDD4, PARK2, BRCA1	20	305	19235	9.45984	0.985575	0.375607	34.0908
KEGG_PATHWAY	hsa04120:Ubiquitin mediated proteolysis	3	1.21951	0.0462842	NEDD4, PARK2, BRCA1	14	137	5085	7.9536	0.87571	0.406243	35.8127
GOTERM_CC_FAT	GO:0005694~chromosome	3	1.21951	0.0884231	SUMO3, NEDD4, BRCA1	15	460	12782	5.55739	0.999966	0.607104	64.9267
GOTERM_BP_FAT	GO:0051603~proteolysis involved in cellular protein catabolic process	8	3.25203	1.03016e-05	SUMO3, SUMO1, NEDD4, UBC, UBD, NEDD8, PARK2, BRCA1	20	600	13528	9.01867	0.00605952	0.00151833	0.0151786
GOTERM_BP_FAT	GO:0044257~cellular protein catabolic process	8	3.25203	1.06438e-05	SUMO3, SUMO1, NEDD4, UBC, UBD, NEDD8, PARK2, BRCA1	20	603	13528	8.9738	0.0062602	0.00125519	0.0156828
GOTERM_BP_FAT	GO:0030163~protein catabolic process	8	3.25203	1.30393e-05	SUMO3, SUMO1, NEDD4, UBC, UBD, NEDD8, PARK2, BRCA1	20	622	13528	8.69968	0.0076637	0.00128138	0.019212
GOTERM_BP_FAT	GO:0044265~cellular macromolecule catabolic process	8	3.25203	3.52514e-05	SUMO3, SUMO1, NEDD4, UBC, UBD, NEDD8, PARK2, BRCA1	20	725	13528	7.46372	0.0205839	0.00296683	0.0519314
GOTERM_BP_FAT	GO:0009057~macromolecule catabolic process	8	3.25203	5.6835e-05	SUMO3, SUMO1, NEDD4, UBC, UBD, NEDD8, PARK2, BRCA1	20	781	13528	6.92855	0.0329776	0.00418293	0.0837153
GOTERM_BP_FAT	GO:0006508~proteolysis	8	3.25203	0.000373515	SUMO3, SUMO1, NEDD4, UBC, UBD, NEDD8, PARK2, BRCA1	20	1054	13528	5.13397	0.197814	0.0182003	0.548975
GOTERM_BP_FAT	GO:0016567~protein ubiquitination	4	1.62602	0.000580255	NEDD4, UBC, PARK2, BRCA1	20	119	13528	22.7361	0.289971	0.0259984	0.851622
GOTERM_BP_FAT	GO:0006511~ubiquitin-dependent protein catabolic process	4	1.62602	0.00443251	NEDD4, UBC, NEDD8, PARK2	20	242	13528	11.1802	0.927269	0.128855	6.33629
GOTERM_BP_FAT	GO:0016567~protein ubiquitination	4	1.62602	0.000580255	NEDD4, UBC, PARK2, BRCA1	20	119	13528	22.7361	0.289971	0.0259984	0.851622
GOTERM_BP_FAT	GO:0010605~negative regulation of macromolecule metabolic process	5	2.03252	0.0173467	SUMO1, NEDD4, YWHAB, UBC, BRCA1	20	734	13528	4.60763	0.999967	0.227489	22.729
GOTERM_BP_FAT	GO:0010604~positive regulation of macromolecule metabolic process	5	2.03252	0.0288879	APP, NEDD4, UBC, NR4A1, BRCA1	20	857	13528	3.94632	1	0.313382	35.0752
GOTERM_BP_FAT	GO:0051247~positive regulation of protein metabolic process	3	1.21951	0.0449574	NEDD4, UBC, BRCA1	20	243	13528	8.35062	1	0.363854	49.2274
GOTERM_BP_FAT	GO:0043065~positive regulation of apoptosis	6	2.43902	0.000254843	CDKN1A, APP, YWHAB, UBC, NR4A1, BRCA1	20	430	13528	9.43814	0.139616	0.0165697	0.374862
GOTERM_BP_FAT	GO:0043068~positive regulation of programmed cell death	6	2.43902	0.000263207	CDKN1A, APP, YWHAB, UBC, NR4A1, BRCA1	20	433	13528	9.37275	0.143853	0.0154113	0.387143
GOTERM_BP_FAT	GO:0010942~positive regulation of cell death	6	2.43902	0.000268899	CDKN1A, APP, YWHAB, UBC, NR4A1, BRCA1	20	435	13528	9.32966	0.146724	0.0143212	0.395499
GOTERM_BP_FAT	GO:0006917~induction of apoptosis	5	2.03252	0.000899071	CDKN1A, APP, UBC, NR4A1, BRCA1	20	320	13528	10.5687	0.411801	0.037197	1.31666
GOTERM_BP_FAT	GO:0012502~induction of programmed cell death	5	2.03252	0.000909602	CDKN1A, APP, UBC, NR4A1, BRCA1	20	321	13528	10.5358	0.415448	0.0351609	1.33198
GOTERM_BP_FAT	GO:0009314~response to radiation	4	1.62602	0.00259022	CDKN1A, APP, NEDD4, BRCA1	20	200	13528	13.528	0.78351	0.0912072	3.7496
GOTERM_BP_FAT	GO:0042981~regulation of apoptosis	6	2.43902	0.00423221	CDKN1A, APP, YWHAB, UBC, NR4A1, BRCA1	20	804	13528	5.04776	0.918104	0.136874	6.05823
GOTERM_BP_FAT	GO:0043067~regulation of programmed cell death	6	2.43902	0.00441605	CDKN1A, APP, YWHAB, UBC, NR4A1, BRCA1	20	812	13528	4.99803	0.926557	0.135037	6.31347
GOTERM_BP_FAT	GO:0010941~regulation of cell death	6	2.43902	0.00448646	CDKN1A, APP, YWHAB, UBC, NR4A1, BRCA1	20	815	13528	4.97963	0.929558	0.124227	6.41106
GOTERM_BP_FAT	GO:0022402~cell cycle process	5	2.03252	0.0070726	CDKN1A, APP, UBC, BRCA1, NFATC1	20	565	13528	5.98584	0.984818	0.160111	9.93035
GOTERM_BP_FAT	GO:0051329~interphase of mitotic cell cycle	3	1.21951	0.00902242	CDKN1A, APP, NFATC1	20	103	13528	19.701	0.995239	0.185897	12.5017
GOTERM_BP_FAT	GO:0051325~interphase	3	1.21951	0.00953442	CDKN1A, APP, NFATC1	20	106	13528	19.1434	0.996491	0.188884	13.1655
GOTERM_BP_FAT	GO:0044092~negative regulation of molecular function	4	1.62602	0.0107771	SUMO1, CDKN1A, UBC, NR4A1	20	334	13528	8.1006	0.998327	0.204132	14.7571
GOTERM_BP_FAT	GO:0051173~positive regulation of nitrogen compound metabolic process	5	2.03252	0.0111342	APP, HSP90AA1, UBC, NR4A1, BRCA1	20	644	13528	5.25155	0.998648	0.203711	15.2094
GOTERM_BP_FAT	GO:0031328~positive regulation of cellular biosynthetic process	5	2.03252	0.0137436	APP, HSP90AA1, UBC, NR4A1, BRCA1	20	685	13528	4.93723	0.999716	0.225203	18.4472
GOTERM_BP_FAT	GO:0009628~response to abiotic stimulus	4	1.62602	0.0139985	CDKN1A, APP, NEDD4, BRCA1	20	368	13528	7.35217	0.999756	0.222789	18.7572
GOTERM_BP_FAT	GO:0000278~mitotic cell cycle	4	1.62602	0.0142034	CDKN1A, APP, UBC, NFATC1	20	370	13528	7.31243	0.999784	0.219825	19.0057
GOTERM_BP_FAT	GO:0009891~positive regulation of biosynthetic process	5	2.03252	0.0144352	APP, HSP90AA1, UBC, NR4A1, BRCA1	20	695	13528	4.86619	0.999812	0.217381	19.2859
GOTERM_BP_FAT	GO:0009416~response to light stimulus	3	1.21951	0.0157696	CDKN1A, APP, NEDD4	20	138	13528	14.7043	0.999915	0.223894	20.8813
GOTERM_BP_FAT	GO:0006357~regulation of transcription from RNA polymerase II promoter	5	2.03252	0.0167987	APP, NEDD4, NR4A1, NEDD8, BRCA1	20	727	13528	4.65199	0.999954	0.231286	22.0915
GOTERM_BP_FAT	GO:0007049~cell cycle	5	2.03252	0.0208757	CDKN1A, APP, UBC, BRCA1, NFATC1	20	776	13528	4.35825	0.999996	0.261833	26.7187
GOTERM_BP_FAT	GO:0032268~regulation of cellular protein metabolic process	4	1.62602	0.0272828	APP, YWHAB, UBC, BRCA1	20	474	13528	5.70802	1	0.309901	33.4758
GOTERM_BP_FAT	GO:0010604~positive regulation of macromolecule metabolic process	5	2.03252	0.0288879	APP, NEDD4, UBC, NR4A1, BRCA1	20	857	13528	3.94632	1	0.313382	35.0752
GOTERM_BP_FAT	GO:0045941~positive regulation of transcription	4	1.62602	0.042486	APP, UBC, NR4A1, BRCA1	20	564	13528	4.79716	1	0.361978	47.2566
GOTERM_BP_FAT	GO:0010628~positive regulation of gene expression	4	1.62602	0.045759	APP, UBC, NR4A1, BRCA1	20	581	13528	4.6568	1	0.359641	49.8517
GOTERM_BP_FAT	GO:0006915~apoptosis	4	1.62602	0.0499752	APP, YWHAB, UBC, BRCA1	20	602	13528	4.49435	1	0.376633	53.0194
GOTERM_BP_FAT	GO:0012501~programmed cell death	4	1.62602	0.0518402	APP, YWHAB, UBC, BRCA1	20	611	13528	4.42815	1	0.383184	54.3602
GOTERM_BP_FAT	GO:0045935~positive regulation of nucleobase, nucleoside, nucleotide and nucleic acid metabolic process	4	1.62602	0.0545949	APP, UBC, NR4A1, BRCA1	20	624	13528	4.3359	1	0.394605	56.2756
GOTERM_BP_FAT	GO:0043086~negative regulation of catalytic activity	3	1.21951	0.0568283	CDKN1A, UBC, NR4A1	20	277	13528	7.32563	1	0.402625	57.7732
GOTERM_BP_FAT	GO:0010557~positive regulation of macromolecule biosynthetic process	4	1.62602	0.0612237	APP, UBC, NR4A1, BRCA1	20	654	13528	4.137	1	0.421989	60.5819
GOTERM_BP_FAT	GO:0031399~regulation of protein modification process	3	1.21951	0.0635176	YWHAB, UBC, BRCA1	20	295	13528	6.87864	1	0.424848	61.9777
GOTERM_BP_FAT	GO:0007268~synaptic transmission	3	1.21951	0.0646582	APP, UBC, PARK2	20	298	13528	6.8094	1	0.42619	62.6543
GOTERM_BP_FAT	GO:0008219~cell death	4	1.62602	0.076849	APP, YWHAB, UBC, BRCA1	20	719	13528	3.763	1	0.480687	69.2189
GOTERM_BP_FAT	GO:0051726~regulation of cell cycle	3	1.21951	0.0776582	CDKN1A, APP, BRCA1	20	331	13528	6.13051	1	0.475091	69.6141
GOTERM_BP_FAT	GO:0016265~death	4	1.62602	0.0781204	APP, YWHAB, UBC, BRCA1	20	724	13528	3.73702	1	0.472644	69.8377
GOTERM_BP_FAT	GO:0040008~regulation of growth	3	1.21951	0.0817535	CDKN1A, APP, UBC	20	341	13528	5.95073	1	0.484241	71.5426
GOTERM_BP_FAT	GO:0019226~transmission of nerve impulse	3	1.21951	0.0854975	APP, UBC, PARK2	20	350	13528	5.79771	1	0.49582	73.2053
GOTERM_BP_FAT	GO:0022403~cell cycle phase	3	1.21951	0.113557	CDKN1A, APP, NFATC1	20	414	13528	4.90145	1	0.593522	83.0715
GOTERM_BP_FAT	GO:0045893~positive regulation of transcription, DNA-dependent	3	1.21951	0.143234	APP, NR4A1, BRCA1	20	477	13528	4.25409	1	0.680215	89.7504
GOTERM_BP_FAT	GO:0051254~positive regulation of RNA metabolic process	3	1.21951	0.145175	APP, NR4A1, BRCA1	20	481	13528	4.21871	1	0.680996	90.0873
GOTERM_BP_FAT	GO:0019220~regulation of phosphate metabolic process	3	1.21951	0.147122	CDKN1A, APP, YWHAB	20	485	13528	4.18392	1	0.681784	90.4149
GOTERM_BP_FAT	GO:0051174~regulation of phosphorus metabolic process	3	1.21951	0.147122	CDKN1A, APP, YWHAB	20	485	13528	4.18392	1	0.681784	90.4149
GOTERM_BP_FAT	GO:0007267~cell-cell signaling	3	1.21951	0.205194	APP, UBC, PARK2	20	600	13528	3.382	1	0.804561	96.6091
GOTERM_BP_FAT	GO:0050877~neurological system process	3	1.21951	0.516905	APP, UBC, PARK2	20	1210	13528	1.67702	1	0.993203	99.9978
GOTERM_BP_FAT	GO:0045449~regulation of transcription	10	4.06504	0.00503837	SUMO1, APP, NEDD4, EZH2, YWHAB, UBC, NR4A1, NEDD8, BRCA1, NFATC1	20	2601	13528	2.60054	0.949215	0.126687	7.1727
GOTERM_BP_FAT	GO:0051252~regulation of RNA metabolic process	8	3.25203	0.0088865	APP, NEDD4, EZH2, ELAVL1, NR4A1, NEDD8, BRCA1, NFATC1	20	1813	13528	2.98467	0.994838	0.18995	12.3247
GOTERM_BP_FAT	GO:0006357~regulation of transcription from RNA polymerase II promoter	5	2.03252	0.0167987	APP, NEDD4, NR4A1, NEDD8, BRCA1	20	727	13528	4.65199	0.999954	0.231286	22.0915
GOTERM_BP_FAT	GO:0010604~positive regulation of macromolecule metabolic process	5	2.03252	0.0288879	APP, NEDD4, UBC, NR4A1, BRCA1	20	857	13528	3.94632	1	0.313382	35.0752
GOTERM_BP_FAT	GO:0006355~regulation of transcription, DNA-dependent	7	2.84553	0.0299497	APP, NEDD4, EZH2, NR4A1, NEDD8, BRCA1, NFATC1	20	1773	13528	2.6705	1	0.311856	36.1134
GOTERM_BP_FAT	GO:0000904~cell morphogenesis involved in differentiation	4	1.62602	0.00453572	ACTB, APP, UBC, NFATC1	20	244	13528	11.0885	0.931585	0.119902	6.47928
GOTERM_BP_FAT	GO:0031175~neuron projection development	4	1.62602	0.00518593	ACTB, APP, NEDD4, UBC	20	256	13528	10.5687	0.95347	0.124864	7.37535
GOTERM_BP_FAT	GO:0048666~neuron development	4	1.62602	0.0112201	ACTB, APP, NEDD4, UBC	20	339	13528	7.98112	0.998715	0.199011	15.3178
GOTERM_BP_FAT	GO:0000902~cell morphogenesis	4	1.62602	0.0128052	ACTB, APP, UBC, NFATC1	20	356	13528	7.6	0.999501	0.217519	17.2963
GOTERM_BP_FAT	GO:0030030~cell projection organization	4	1.62602	0.0139985	ACTB, APP, NEDD4, UBC	20	368	13528	7.35217	0.999756	0.222789	18.7572
GOTERM_BP_FAT	GO:0032989~cellular component morphogenesis	4	1.62602	0.0171399	ACTB, APP, UBC, NFATC1	20	397	13528	6.81511	0.999963	0.230137	22.489
GOTERM_BP_FAT	GO:0030182~neuron differentiation	4	1.62602	0.0222123	ACTB, APP, NEDD4, UBC	20	438	13528	6.17717	0.999998	0.27061	28.179
GOTERM_BP_FAT	GO:0006928~cell motion	4	1.62602	0.0274319	ACTB, APP, UBC, ITGA4	20	475	13528	5.696	1	0.305586	33.6259
GOTERM_BP_FAT	GO:0010604~positive regulation of macromolecule metabolic process	5	2.03252	0.0288879	APP, NEDD4, UBC, NR4A1, BRCA1	20	857	13528	3.94632	1	0.313382	35.0752
GOTERM_BP_FAT	GO:0007409~axonogenesis	3	1.21951	0.0295277	ACTB, APP, UBC	20	193	13528	10.514	1	0.313569	35.7027
GOTERM_BP_FAT	GO:0048667~cell morphogenesis involved in neuron differentiation	3	1.21951	0.0341836	ACTB, APP, UBC	20	209	13528	9.70909	1	0.326075	40.1013
GOTERM_BP_FAT	GO:0048812~neuron projection morphogenesis	3	1.21951	0.0353903	ACTB, APP, UBC	20	213	13528	9.52676	1	0.32543	41.1946
GOTERM_BP_FAT	GO:0048858~cell projection morphogenesis	3	1.21951	0.0456265	ACTB, APP, UBC	20	245	13528	8.28245	1	0.363448	49.749
GOTERM_BP_FAT	GO:0032990~cell part morphogenesis	3	1.21951	0.0493731	ACTB, APP, UBC	20	256	13528	7.92656	1	0.37761	52.5788
GOTERM_BP_FAT	GO:0010605~negative regulation of macromolecule metabolic process	5	2.03252	0.0173467	SUMO1, NEDD4, YWHAB, UBC, BRCA1	20	734	13528	4.60763	0.999967	0.227489	22.729
GOTERM_BP_FAT	GO:0016481~negative regulation of transcription	4	1.62602	0.0250997	SUMO1, NEDD4, YWHAB, BRCA1	20	459	13528	5.89455	1	0.294457	31.2417
GOTERM_BP_FAT	GO:0010629~negative regulation of gene expression	4	1.62602	0.0319504	SUMO1, NEDD4, YWHAB, BRCA1	20	504	13528	5.36825	1	0.323612	38.0277
GOTERM_BP_FAT	GO:0045934~negative regulation of nucleobase, nucleoside, nucleotide and nucleic acid metabolic process	4	1.62602	0.0332629	SUMO1, NEDD4, YWHAB, BRCA1	20	512	13528	5.28437	1	0.323858	39.2544
GOTERM_BP_FAT	GO:0051172~negative regulation of nitrogen compound metabolic process	4	1.62602	0.0344348	SUMO1, NEDD4, YWHAB, BRCA1	20	519	13528	5.2131	1	0.323001	40.3304
GOTERM_BP_FAT	GO:0010558~negative regulation of macromolecule biosynthetic process	4	1.62602	0.0393394	SUMO1, NEDD4, YWHAB, BRCA1	20	547	13528	4.94625	1	0.349836	44.6441
GOTERM_BP_FAT	GO:0031327~negative regulation of cellular biosynthetic process	4	1.62602	0.0419215	SUMO1, NEDD4, YWHAB, BRCA1	20	561	13528	4.82282	1	0.363135	46.7965
GOTERM_BP_FAT	GO:0033554~cellular response to stress	4	1.62602	0.0428645	SUMO1, CDKN1A, NEDD4, BRCA1	20	566	13528	4.78021	1	0.359597	47.563
GOTERM_BP_FAT	GO:0009890~negative regulation of biosynthetic process	4	1.62602	0.0442031	SUMO1, NEDD4, YWHAB, BRCA1	20	573	13528	4.72182	1	0.363708	48.6333
GOTERM_BP_FAT	GO:0007242~intracellular signaling cascade	4	1.62602	0.256325	NEDD4, YWHAB, BRCA1, NFATC1	20	1256	13528	2.15414	1	0.875083	98.7271
GOTERM_BP_FAT	GO:0016044~membrane organization	4	1.62602	0.0153614	APP, HSP90AA1, NEDD4, LMNA	20	381	13528	7.10131	0.999892	0.224083	20.3964
GOTERM_BP_FAT	GO:0046907~intracellular transport	4	1.62602	0.0619072	APP, HSP90AA1, NEDD4, YWHAB	20	657	13528	4.11811	1	0.420996	61.0027
GOTERM_BP_FAT	GO:0046907~intracellular transport	4	1.62602	0.0619072	APP, HSP90AA1, NEDD4, YWHAB	20	657	13528	4.11811	1	0.420996	61.0027
GOTERM_BP_FAT	GO:0006350~transcription	3	1.21951	0.818294	EZH2, NR4A1, NFATC1	20	2101	13528	0.965826	1	0.999991	100
GOTERM_CC_FAT	GO:0005694~chromosome	3	1.21951	0.0884231	SUMO3, NEDD4, BRCA1	15	460	12782	5.55739	0.999966	0.607104	64.9267
GOTERM_CC_FAT	GO:0005654~nucleoplasm	8	3.25203	1.62427e-05	ACTB, SUMO1, CDKN1A, EZH2, YWHAB, UBC, NR4A1, BRCA1	15	882	12782	7.7291	0.00180133	0.00180133	0.0183805
GOTERM_CC_FAT	GO:0043233~organelle lumen	10	4.06504	2.39782e-05	ACTB, SUMO1, CDKN1A, APP, EZH2, LMNA, YWHAB, UBC, NR4A1, BRCA1	15	1820	12782	4.68205	0.00265807	0.00132992	0.027133
GOTERM_CC_FAT	GO:0031974~membrane-enclosed lumen	10	4.06504	2.8201e-05	ACTB, SUMO1, CDKN1A, APP, EZH2, LMNA, YWHAB, UBC, NR4A1, BRCA1	15	1856	12782	4.59124	0.00312546	0.00104291	0.0319107
GOTERM_CC_FAT	GO:0031981~nuclear lumen	9	3.65854	4.30238e-05	ACTB, SUMO1, CDKN1A, EZH2, LMNA, YWHAB, UBC, NR4A1, BRCA1	15	1450	12782	5.2891	0.00476436	0.00119322	0.0486797
GOTERM_CC_FAT	GO:0070013~intracellular organelle lumen	9	3.65854	0.000190181	ACTB, SUMO1, CDKN1A, EZH2, LMNA, YWHAB, UBC, NR4A1, BRCA1	15	1779	12782	4.31096	0.0208908	0.00421352	0.215019
GOTERM_CC_FAT	GO:0043232~intracellular non-membrane-bounded organelle	7	2.84553	0.0468278	SUMO3, ACTB, APP, NEDD4, LMNA, UBC, BRCA1	15	2596	12782	2.29774	0.995124	0.446505	41.8861
GOTERM_CC_FAT	GO:0043228~non-membrane-bounded organelle	7	2.84553	0.0468278	SUMO3, ACTB, APP, NEDD4, LMNA, UBC, BRCA1	15	2596	12782	2.29774	0.995124	0.446505	41.8861
GOTERM_CC_FAT	GO:0000267~cell fraction	4	1.62602	0.109337	ACTB, APP, NEDD4, LMNA	15	1083	12782	3.14731	0.999997	0.627925	73.0287
GOTERM_CC_FAT	GO:0005856~cytoskeleton	4	1.62602	0.186652	ACTB, APP, LMNA, BRCA1	15	1381	12782	2.46816	1	0.700894	90.3486
GOTERM_CC_FAT	GO:0044430~cytoskeletal part	3	1.21951	0.280388	APP, LMNA, BRCA1	15	952	12782	2.68529	1	0.809894	97.5858
GOTERM_CC_FAT	GO:0048471~perinuclear region of cytoplasm	5	2.03252	0.000211378	APP, NEDD4, LMNA, YWHAB, PARK2	15	288	12782	14.794	0.0231923	0.00390327	0.238958
GOTERM_CC_FAT	GO:0000267~cell fraction	4	1.62602	0.109337	ACTB, APP, NEDD4, LMNA	15	1083	12782	3.14731	0.999997	0.627925	73.0287
GOTERM_CC_FAT	GO:0005626~insoluble fraction	3	1.21951	0.233248	APP, NEDD4, LMNA	15	839	12782	3.04696	1	0.754348	95.0497
GOTERM_CC_FAT	GO:0005886~plasma membrane	4	1.62602	0.830373	APP, NEDD4, LMNA, ITGA4	15	3777	12782	0.902445	1	0.999727	100
GOTERM_CC_FAT	GO:0043005~neuron projection	3	1.21951	0.0525472	ACTB, APP, PARK2	15	342	12782	7.47485	0.9975	0.450726	45.7125
GOTERM_CC_FAT	GO:0042995~cell projection	3	1.21951	0.175547	ACTB, APP, PARK2	15	697	12782	3.66772	1	0.695896	88.7477
GOTERM_CC_FAT	GO:0016023~cytoplasmic membrane-bounded vesicle	3	1.21951	0.119612	APP, HSP90AA1, YWHAB	15	550	12782	4.648	0.999999	0.635797	76.3479
GOTERM_CC_FAT	GO:0031988~membrane-bounded vesicle	3	1.21951	0.126168	APP, HSP90AA1, YWHAB	15	568	12782	4.5007	1	0.631391	78.2664
GOTERM_CC_FAT	GO:0031410~cytoplasmic vesicle	3	1.21951	0.154035	APP, HSP90AA1, YWHAB	15	642	12782	3.98193	1	0.686667	84.9395
GOTERM_CC_FAT	GO:0031982~vesicle	3	1.21951	0.164912	APP, HSP90AA1, YWHAB	15	670	12782	3.81552	1	0.691712	86.9913
GOTERM_CC_FAT	GO:0016021~integral to membrane	3	1.21951	0.993939	SUMO1, APP, ITGA4	15	5297	12782	0.482613	1	1	100
GOTERM_CC_FAT	GO:0031224~intrinsic to membrane	3	1.21951	0.995517	SUMO1, APP, ITGA4	15	5485	12782	0.466071	1	1	100
GOTERM_MF_FAT	GO:0019787~small conjugating protein ligase activity	4	1.62602	0.00101709	SUMO3, NEDD4, PARK2, BRCA1	17	166	12983	18.4026	0.114951	0.0592298	1.16135
GOTERM_MF_FAT	GO:0016881~acid-amino acid ligase activity	4	1.62602	0.00176425	SUMO3, NEDD4, PARK2, BRCA1	17	201	12983	15.1981	0.190952	0.0681955	2.00662
GOTERM_MF_FAT	GO:0016879~ligase activity, forming carbon-nitrogen bonds	4	1.62602	0.00262328	SUMO3, NEDD4, PARK2, BRCA1	17	231	12983	13.2243	0.270363	0.075777	2.9703
GOTERM_MF_FAT	GO:0004842~ubiquitin-protein ligase activity	3	1.21951	0.0137705	NEDD4, PARK2, BRCA1	17	147	12983	15.5858	0.81061	0.283079	14.7153
GOTERM_MF_FAT	GO:0042802~identical protein binding	6	2.43902	0.000794637	APP, HSP90AA1, ELAVL1, NR4A1, ITGA4, BRCA1	17	640	12983	7.15974	0.0909856	0.0909856	0.908401
GOTERM_MF_FAT	GO:0030528~transcription regulator activity	6	2.43902	0.0309454	EZH2, YWHAB, UBC, NR4A1, BRCA1, NFATC1	17	1512	12983	3.03058	0.976997	0.416596	30.2913
GOTERM_MF_FAT	GO:0008270~zinc ion binding	6	2.43902	0.140517	CDKN1A, APP, UBC, NR4A1, PARK2, BRCA1	17	2311	12983	1.98279	1	0.837502	82.4171
GOTERM_MF_FAT	GO:0046914~transition metal ion binding	6	2.43902	0.247065	CDKN1A, APP, UBC, NR4A1, PARK2, BRCA1	17	2785	12983	1.64533	1	0.941444	96.1518
GOTERM_MF_FAT	GO:0046872~metal ion binding	7	2.84553	0.403589	CDKN1A, APP, UBC, NR4A1, ITGA4, PARK2, BRCA1	17	4140	12983	1.29129	1	0.988085	99.7349
GOTERM_MF_FAT	GO:0043169~cation binding	7	2.84553	0.413836	CDKN1A, APP, UBC, NR4A1, ITGA4, PARK2, BRCA1	17	4179	12983	1.27924	1	0.986063	99.7827
GOTERM_MF_FAT	GO:0043167~ion binding	7	2.84553	0.430173	CDKN1A, APP, UBC, NR4A1, ITGA4, PARK2, BRCA1	17	4241	12983	1.26054	1	0.985274	99.8429
GOTERM_MF_FAT	GO:0003677~DNA binding	5	2.03252	0.320498	APP, EZH2, NR4A1, BRCA1, NFATC1	17	2331	12983	1.63815	1	0.971752	98.8151
GOTERM_MF_FAT	GO:0019899~enzyme binding	4	1.62602	0.0246091	ACTB, NEDD4, YWHAB, BRCA1	17	523	12983	5.84096	0.949714	0.392461	24.876
GOTERM_MF_FAT	GO:0030528~transcription regulator activity	6	2.43902	0.0309454	EZH2, YWHAB, UBC, NR4A1, BRCA1, NFATC1	17	1512	12983	3.03058	0.976997	0.416596	30.2913
GOTERM_MF_FAT	GO:0016563~transcription activator activity	3	1.21951	0.0892216	NR4A1, BRCA1, NFATC1	17	410	12983	5.58809	0.999987	0.712369	65.7953
GOTERM_MF_FAT	GO:0003677~DNA binding	5	2.03252	0.320498	APP, EZH2, NR4A1, BRCA1, NFATC1	17	2331	12983	1.63815	1	0.971752	98.8151
GOTERM_MF_FAT	GO:0000166~nucleotide binding	4	1.62602	0.540254	ACTB, HSP90AA1, ELAVL1, PRKG2	17	2245	12983	1.36072	1	0.995853	99.9866
GOTERM_MF_FAT	GO:0005524~ATP binding	3	1.21951	0.557914	ACTB, HSP90AA1, PRKG2	17	1477	12983	1.5512	1	0.995668	99.9915
GOTERM_MF_FAT	GO:0032559~adenyl ribonucleotide binding	3	1.21951	0.565629	ACTB, HSP90AA1, PRKG2	17	1497	12983	1.53047	1	0.994838	99.993
GOTERM_MF_FAT	GO:0030554~adenyl nucleotide binding	3	1.21951	0.595639	ACTB, HSP90AA1, PRKG2	17	1577	12983	1.45283	1	0.995629	99.9969
GOTERM_MF_FAT	GO:0001883~purine nucleoside binding	3	1.21951	0.604372	ACTB, HSP90AA1, PRKG2	17	1601	12983	1.43105	1	0.995002	99.9976
GOTERM_MF_FAT	GO:0001882~nucleoside binding	3	1.21951	0.608332	ACTB, HSP90AA1, PRKG2	17	1612	12983	1.42129	1	0.993981	99.9979
GOTERM_MF_FAT	GO:0032555~purine ribonucleotide binding	3	1.21951	0.683165	ACTB, HSP90AA1, PRKG2	17	1836	12983	1.24789	1	0.997513	99.9998
GOTERM_MF_FAT	GO:0032553~ribonucleotide binding	3	1.21951	0.683165	ACTB, HSP90AA1, PRKG2	17	1836	12983	1.24789	1	0.997513	99.9998
GOTERM_MF_FAT	GO:0017076~purine nucleotide binding	3	1.21951	0.70779	ACTB, HSP90AA1, PRKG2	17	1918	12983	1.19453	1	0.99787	99.9999
INTERPRO	IPR000626:Ubiquitin	6	2.43902	1.44936e-09	SUMO3, SUMO1, UBC, UBD, NEDD8, PARK2	20	46	16659	108.646	1.10151e-07	1.10151e-07	1.52516e-06
INTERPRO	IPR019955:Ubiquitin supergroup	5	2.03252	3.15974e-07	SUMO3, SUMO1, UBC, NEDD8, PARK2	20	52	16659	80.0913	2.40138e-05	1.2007e-05	0.0003325
INTERPRO	IPR019956:Ubiquitin subgroup	3	1.21951	6.73685e-05	UBC, UBD, NEDD8	20	11	16659	227.168	0.0051071	0.00170527	0.0708692
INTERPRO	IPR019954:Ubiquitin conserved site	3	1.21951	0.000676494	UBC, NEDD8, PARK2	20	34	16659	73.4956	0.0501308	0.0127754	0.709587
KEGG_PATHWAY	hsa04120:Ubiquitin mediated proteolysis	3	1.21951	0.0462842	NEDD4, PARK2, BRCA1	14	137	5085	7.9536	0.87571	0.406243	35.8127
KEGG_PATHWAY	hsa05412:Arrhythmogenic right ventricular cardiomyopathy (ARVC)	3	1.21951	0.0154574	ACTB, LMNA, ITGA4	14	76	5085	14.3374	0.496129	0.496129	13.5622
KEGG_PATHWAY	hsa05410:Hypertrophic cardiomyopathy (HCM)	3	1.21951	0.0191132	ACTB, LMNA, ITGA4	14	85	5085	12.8193	0.572209	0.345942	16.5188
KEGG_PATHWAY	hsa05414:Dilated cardiomyopathy	3	1.21951	0.0221865	ACTB, LMNA, ITGA4	14	92	5085	11.8439	0.627381	0.280405	18.9342
SMART	SM00213:UBQ	6	2.43902	1.57878e-08	SUMO3, SUMO1, UBC, UBD, NEDD8, PARK2	18	46	9079	65.7899	3.47331e-07	3.47331e-07	1.2356e-05
SP_PIR_KEYWORDS	ubl conjugation pathway	7	2.84553	6.74595e-06	SUMO3, SUMO1, NEDD4, UBD, NEDD8, PARK2, BRCA1	20	509	19235	13.2264	0.000782226	0.000782226	0.00769606
SP_PIR_KEYWORDS	isopeptide bond	4	1.62602	0.00359543	SUMO3, SUMO1, UBC, NEDD8	20	319	19235	12.0596	0.34152	0.0801681	4.02607
SP_PIR_KEYWORDS	ligase	3	1.21951	0.0358816	NEDD4, PARK2, BRCA1	20	305	19235	9.45984	0.985575	0.375607	34.0908
SP_PIR_KEYWORDS	zinc	6	2.43902	0.0566474	CDKN1A, APP, UBC, NR4A1, PARK2, BRCA1	20	2189	19235	2.63614	0.998846	0.491584	48.5885
SP_PIR_KEYWORDS	zinc-finger	5	2.03252	0.0833078	CDKN1A, UBC, NR4A1, PARK2, BRCA1	20	1718	19235	2.79904	0.999959	0.568652	62.9306
SP_PIR_KEYWORDS	metal-binding	6	2.43902	0.158293	CDKN1A, APP, UBC, NR4A1, PARK2, BRCA1	20	2972	19235	1.94162	1	0.785115	85.9985
SP_PIR_KEYWORDS	disease mutation	5	2.03252	0.0664111	ACTB, APP, LMNA, PARK2, BRCA1	20	1591	19235	3.02247	0.999655	0.515518	54.3426
SP_PIR_KEYWORDS	alternative splicing	7	2.84553	0.812735	APP, HSP90AA1, NEDD4, LMNA, PARK2, BRCA1, NFATC1	20	7488	19235	0.899072	1	0.99994	100
SP_PIR_KEYWORDS	disease mutation	5	2.03252	0.0664111	ACTB, APP, LMNA, PARK2, BRCA1	20	1591	19235	3.02247	0.999655	0.515518	54.3426
SP_PIR_KEYWORDS	dna-binding	3	1.21951	0.563182	NR4A1, BRCA1, NFATC1	20	1868	19235	1.54457	1	0.996488	99.9921
SP_PIR_KEYWORDS	transcription regulation	3	1.21951	0.60953	EZH2, NR4A1, NFATC1	20	2026	19235	1.42411	1	0.997666	99.9978
SP_PIR_KEYWORDS	Transcription	3	1.21951	0.622096	EZH2, NR4A1, NFATC1	20	2071	19235	1.39317	1	0.997371	99.9985
SP_PIR_KEYWORDS	atp-binding	3	1.21951	0.380546	ACTB, HSP90AA1, PRKG2	20	1326	19235	2.1759	1	0.975366	99.5763
SP_PIR_KEYWORDS	nucleotide-binding	3	1.21951	0.505643	ACTB, HSP90AA1, PRKG2	20	1686	19235	1.7113	1	0.993949	99.9677
SP_PIR_KEYWORDS	membrane	3	1.21951	0.994254	SUMO1, APP, ITGA4	20	6256	19235	0.461197	1	1	100
UP_SEQ_FEATURE	cross-link:Glycyl lysine isopeptide (Gly-Lys) (interchain with K-? in acceptor proteins)	4	1.62602	1.36728e-07	SUMO3, SUMO1, UBC, NEDD8	20	11	19113	347.509	2.09192e-05	2.09192e-05	0.000163835
UP_SEQ_FEATURE	domain:Ubiquitin-like	3	1.21951	0.00078722	SUMO3, SUMO1, PARK2	20	42	19113	68.2607	0.113516	0.0393682	0.939224
UP_SEQ_FEATURE	splice variant	8	3.25203	0.660486	APP, HSP90AA1, NEDD4, LMNA, YWHAB, PARK2, BRCA1, NFATC1	20	7458	19113	1.0251	1	1	99.9998

## Sheet: KEGG_4 h
Table S2. KEGG (4 h).
Category	Term	Count	%	p Value	Genes	List Total	Pop Hits	Pop Total	Fold Enrichment	Bonferroni	Benjamini	FDR
KEGG_PATHWAY	hsa04120:Ubiquitin mediated proteolysis	3	1.21951	0.0462842	NEDD4, PARK2, BRCA1	14	137	5085	7.9536	0.87571	0.406243	35.8127
KEGG_PATHWAY	hsa05412:Arrhythmogenic right ventricular cardiomyopathy (ARVC)	3	1.21951	0.0154574	ACTB, LMNA, ITGA4	14	76	5085	14.3374	0.496129	0.496129	13.5622
KEGG_PATHWAY	hsa05410:Hypertrophic cardiomyopathy (HCM)	3	1.21951	0.0191132	ACTB, LMNA, ITGA4	14	85	5085	12.8193	0.572209	0.345942	16.5188
KEGG_PATHWAY	hsa05414:Dilated cardiomyopathy	3	1.21951	0.0221865	ACTB, LMNA, ITGA4	14	92	5085	11.8439	0.627381	0.280405	18.9342

## Sheet: David_Ori_8 h
Table S3. David (8 h).
Annotation Cluster 1	Enrichment Score: 5.810740931105766
Category	Term	Count	%	p Value	Genes	List Total	Pop Hits	Pop Total	Fold Enrichment	Bonferroni	Benjamini	FDR
GOTERM_CC_FAT	GO:0005654~nucleoplasm	10	2.53807	1.16815e-07	SUMO1, CDKN1A, RELA, UBC, TRIM27, MDM2, NFKB1, NXF1, MYC, CUL1	16	882	12782	9.05754	8.17702e-06	8.17702e-06	0.000120894
GOTERM_CC_FAT	GO:0031981~nuclear lumen	11	2.79188	6.01026e-07	SRPK2, SUMO1, CDKN1A, RELA, UBC, TRIM27, MDM2, NFKB1, NXF1, MYC, CUL1	16	1450	12782	6.06043	4.20709e-05	2.10357e-05	0.000622008
GOTERM_CC_FAT	GO:0070013~intracellular organelle lumen	11	2.79188	4.09583e-06	SRPK2, SUMO1, CDKN1A, RELA, UBC, TRIM27, MDM2, NFKB1, NXF1, MYC, CUL1	16	1779	12782	4.93964	0.000286668	9.5565e-05	0.00423875
GOTERM_CC_FAT	GO:0043233~organelle lumen	11	2.79188	5.06201e-06	SRPK2, SUMO1, CDKN1A, RELA, UBC, TRIM27, MDM2, NFKB1, NXF1, MYC, CUL1	16	1820	12782	4.82837	0.000354279	8.85815e-05	0.00523863
GOTERM_CC_FAT	GO:0031974~membrane-enclosed lumen	11	2.79188	6.07069e-06	SRPK2, SUMO1, CDKN1A, RELA, UBC, TRIM27, MDM2, NFKB1, NXF1, MYC, CUL1	16	1856	12782	4.73471	0.00042486	8.49863e-05	0.00628247
Annotation Cluster 2	Enrichment Score: 4.1416219807023085
Category	Term	Count	%	p Value	Genes	List Total	Pop Hits	Pop Total	Fold Enrichment	Bonferroni	Benjamini	FDR
GOTERM_BP_FAT	GO:0044265~cellular macromolecule catabolic process	10	2.53807	1.09072e-07	SUMO1, RELA, UBC, MDM2, NFKB1, NEDD8, HSPA1A, PARK2, MYC, CUL1	19	725	13528	9.82069	7.23122e-05	7.23122e-05	0.000163291
GOTERM_BP_FAT	GO:0009057~macromolecule catabolic process	10	2.53807	2.06454e-07	SUMO1, RELA, UBC, MDM2, NFKB1, NEDD8, HSPA1A, PARK2, MYC, CUL1	19	781	13528	9.11652	0.00013687	6.84372e-05	0.000309081
GOTERM_BP_FAT	GO:0051603~proteolysis involved in cellular protein catabolic process	8	2.03046	6.76414e-06	SUMO1, RELA, UBC, MDM2, NFKB1, NEDD8, PARK2, CUL1	19	600	13528	9.49333	0.0044746	0.00149376	0.0101261
GOTERM_BP_FAT	GO:0044257~cellular protein catabolic process	8	2.03046	6.99025e-06	SUMO1, RELA, UBC, MDM2, NFKB1, NEDD8, PARK2, CUL1	19	603	13528	9.4461	0.00462383	0.00115797	0.0104646
GOTERM_BP_FAT	GO:0030163~protein catabolic process	8	2.03046	8.57426e-06	SUMO1, RELA, UBC, MDM2, NFKB1, NEDD8, PARK2, CUL1	19	622	13528	9.15756	0.00566863	0.00113631	0.0128357
INTERPRO	IPR000626:Ubiquitin	4	1.01523	1.5618e-05	SUMO1, UBC, NEDD8, PARK2	19	46	16659	76.2426	0.00110827	0.00110827	0.016209
INTERPRO	IPR019955:Ubiquitin supergroup	4	1.01523	2.26457e-05	SUMO1, UBC, NEDD8, PARK2	19	52	16659	67.4453	0.00160657	0.000803609	0.0235019
GOTERM_BP_FAT	GO:0032446~protein modification by small protein conjugation	5	1.26904	2.38355e-05	SUMO1, UBC, MDM2, NEDD8, PARK2	19	132	13528	26.9697	0.0156789	0.00225504	0.0356781
UP_SEQ_FEATURE	cross-link:Glycyl lysine isopeptide (Gly-Lys) (interchain with K-? in acceptor proteins)	3	0.761421	4.58424e-05	SUMO1, UBC, NEDD8	19	11	19113	274.349	0.00571404	0.00190832	0.0529998
GOTERM_BP_FAT	GO:0070647~protein modification by small protein conjugation or removal	5	1.26904	5.06765e-05	SUMO1, UBC, MDM2, NEDD8, PARK2	19	160	13528	22.25	0.0330412	0.00372631	0.0758408
SMART	SM00213:UBQ	4	1.01523	5.30796e-05	SUMO1, UBC, NEDD8, PARK2	16	46	9079	49.3424	0.000955003	0.000955003	0.0391196
SP_PIR_KEYWORDS	isopeptide bond	5	1.26904	0.000189027	SUMO1, AR, UBC, NEDD8, CUL1	19	319	19235	15.8678	0.015196	0.00382084	0.201268
GOTERM_BP_FAT	GO:0006511~ubiquitin-dependent protein catabolic process	5	1.26904	0.00025091	UBC, MDM2, NEDD8, PARK2, CUL1	19	242	13528	14.7107	0.153271	0.0103445	0.374979
GOTERM_BP_FAT	GO:0006508~proteolysis	8	2.03046	0.000252814	SUMO1, RELA, UBC, MDM2, NFKB1, NEDD8, PARK2, CUL1	19	1054	13528	5.40417	0.154339	0.00981255	0.37782
INTERPRO	IPR019954:Ubiquitin conserved site	3	0.761421	0.000606059	UBC, NEDD8, PARK2	19	34	16659	77.3638	0.04213	0.0142453	0.627255
GOTERM_BP_FAT	GO:0043632~modification-dependent macromolecule catabolic process	6	1.52284	0.000730675	SUMO1, UBC, MDM2, NEDD8, PARK2, CUL1	19	574	13528	7.44251	0.384066	0.0184664	1.08833
GOTERM_BP_FAT	GO:0019941~modification-dependent protein catabolic process	6	1.52284	0.000730675	SUMO1, UBC, MDM2, NEDD8, PARK2, CUL1	19	574	13528	7.44251	0.384066	0.0184664	1.08833
SP_PIR_KEYWORDS	ubl conjugation pathway	5	1.26904	0.00110376	SUMO1, MDM2, NEDD8, PARK2, CUL1	19	509	19235	9.94468	0.0855695	0.0126978	1.17006
GOTERM_BP_FAT	GO:0016567~protein ubiquitination	3	0.761421	0.0107078	UBC, MDM2, PARK2	19	119	13528	17.9496	0.999205	0.121706	14.8854
KEGG_PATHWAY	hsa04120:Ubiquitin mediated proteolysis	3	0.761421	0.0337986	MDM2, PARK2, CUL1	12	137	5085	9.2792	0.814512	0.170719	28.0834
Annotation Cluster 3	Enrichment Score: 3.390149537012924
Category	Term	Count	%	p Value	Genes	List Total	Pop Hits	Pop Total	Fold Enrichment	Bonferroni	Benjamini	FDR
SP_PIR_KEYWORDS	ubl conjugation	9	2.28426	2.42841e-08	BMI1, CDKN1A, AR, RELA, UBC, MDM2, NFKB1, PARK2, CUL1	19	588	19235	15.4954	1.96701e-06	1.96701e-06	2.58804e-05
KEGG_PATHWAY	hsa05220:Chronic myeloid leukemia	5	1.26904	1.3325e-05	CDKN1A, RELA, MDM2, NFKB1, MYC	12	75	5085	28.25	0.000652716	0.000652716	0.0127752
KEGG_PATHWAY	hsa05200:Pathways in cancer	7	1.77665	2.41201e-05	CDKN1A, AR, RELA, PPARG, MDM2, NFKB1, MYC	12	328	5085	9.04345	0.0011812	0.000590775	0.0231239
KEGG_PATHWAY	hsa05215:Prostate cancer	5	1.26904	2.63538e-05	CDKN1A, AR, RELA, MDM2, NFKB1	12	89	5085	23.8062	0.00129052	0.000430358	0.0252651
GOTERM_BP_FAT	GO:0042127~regulation of cell proliferation	7	1.77665	0.000385719	BMI1, CDKN1A, RELA, PPARG, MDM2, MYC, CUL1	19	787	13528	6.33291	0.225688	0.0141096	0.575905
GOTERM_BP_FAT	GO:0008284~positive regulation of cell proliferation	5	1.26904	0.00188092	BMI1, CDKN1A, RELA, MDM2, MYC	19	414	13528	8.59903	0.712985	0.0340786	2.77921
KEGG_PATHWAY	hsa04110:Cell cycle	4	1.01523	0.00207119	CDKN1A, MDM2, MYC, CUL1	12	125	5085	13.56	0.0966033	0.0250785	1.96828
GOTERM_CC_FAT	GO:0005829~cytosol	7	1.77665	0.00274193	CDKN1A, RELA, PPARG, UBC, MDM2, NFKB1, CUL1	16	1330	12782	4.20461	0.174857	0.0315255	2.80157
KEGG_PATHWAY	hsa05219:Bladder cancer	3	0.761421	0.00349448	CDKN1A, MDM2, MYC	12	42	5085	30.2679	0.157624	0.0337241	3.30066
GOTERM_BP_FAT	GO:0022402~cell cycle process	5	1.26904	0.00577129	CDKN1A, UBC, MDM2, MYC, CUL1	19	565	13528	6.30088	0.978451	0.0768346	8.30039
GOTERM_BP_FAT	GO:0007049~cell cycle	5	1.26904	0.0172455	CDKN1A, UBC, MDM2, MYC, CUL1	19	776	13528	4.58763	0.99999	0.164906	22.9283
GOTERM_BP_FAT	GO:0051726~regulation of cell cycle	3	0.761421	0.0705907	CDKN1A, MDM2, MYC	19	331	13528	6.45317	1	0.400045	66.5783
Annotation Cluster 4	Enrichment Score: 2.3995610899797644
Category	Term	Count	%	p Value	Genes	List Total	Pop Hits	Pop Total	Fold Enrichment	Bonferroni	Benjamini	FDR
UP_SEQ_FEATURE	short sequence motif:Nuclear localization signal	6	1.52284	9.8465e-06	BMI1, CDKN1A, RELA, MDM2, NFKB1, NXF1	19	325	19113	18.5713	0.00123006	0.00061522	0.011386
KEGG_PATHWAY	hsa05220:Chronic myeloid leukemia	5	1.26904	1.3325e-05	CDKN1A, RELA, MDM2, NFKB1, MYC	12	75	5085	28.25	0.000652716	0.000652716	0.0127752
GOTERM_BP_FAT	GO:0006357~regulation of transcription from RNA polymerase II promoter	8	2.03046	2.37608e-05	AR, RELA, PPARG, TRIM27, MDM2, NFKB1, NEDD8, MYC	19	727	13528	7.83494	0.0156302	0.00262216	0.0355663
KEGG_PATHWAY	hsa05200:Pathways in cancer	7	1.77665	2.41201e-05	CDKN1A, AR, RELA, PPARG, MDM2, NFKB1, MYC	12	328	5085	9.04345	0.0011812	0.000590775	0.0231239
GOTERM_BP_FAT	GO:0010605~negative regulation of macromolecule metabolic process	8	2.03046	2.52849e-05	SUMO1, RELA, PPARG, UBC, TRIM27, MDM2, NFKB1, MYC	19	734	13528	7.76022	0.0166244	0.00209332	0.0378473
KEGG_PATHWAY	hsa05215:Prostate cancer	5	1.26904	2.63538e-05	CDKN1A, AR, RELA, MDM2, NFKB1	12	89	5085	23.8062	0.00129052	0.000430358	0.0252651
GOTERM_BP_FAT	GO:0010604~positive regulation of macromolecule metabolic process	8	2.03046	6.85392e-05	AR, RELA, PPARG, UBC, MDM2, NFKB1, MYC, CUL1	19	857	13528	6.64644	0.044426	0.004534	0.102561
GOTERM_BP_FAT	GO:0043066~negative regulation of apoptosis	6	1.52284	7.71631e-05	CDKN1A, RELA, UBC, NFKB1, HSPA1A, MYC	19	354	13528	12.0678	0.0498744	0.00464021	0.115458
GOTERM_BP_FAT	GO:0043069~negative regulation of programmed cell death	6	1.52284	8.24657e-05	CDKN1A, RELA, UBC, NFKB1, HSPA1A, MYC	19	359	13528	11.8997	0.0532091	0.00454605	0.123388
GOTERM_BP_FAT	GO:0060548~negative regulation of cell death	6	1.52284	8.35593e-05	CDKN1A, RELA, UBC, NFKB1, HSPA1A, MYC	19	360	13528	11.8667	0.0538954	0.00425263	0.125023
GOTERM_BP_FAT	GO:0006916~anti-apoptosis	5	1.26904	0.000135161	RELA, UBC, NFKB1, HSPA1A, MYC	19	206	13528	17.2816	0.0857195	0.00638083	0.202158
GOTERM_BP_FAT	GO:0010033~response to organic substance	7	1.77665	0.000239818	CDKN1A, AR, RELA, PPARG, NEDD8, HSPA1A, MYC	19	721	13528	6.91262	0.147019	0.0105452	0.35843
GOTERM_BP_FAT	GO:0010629~negative regulation of gene expression	6	1.52284	0.000402845	SUMO1, PPARG, TRIM27, MDM2, NFKB1, MYC	19	504	13528	8.47619	0.234434	0.0139616	0.601404
GOTERM_BP_FAT	GO:0042981~regulation of apoptosis	7	1.77665	0.000432812	CDKN1A, RELA, UBC, NFKB1, HSPA1A, MYC, CUL1	19	804	13528	6.199	0.249501	0.0142483	0.646006
GOTERM_BP_FAT	GO:0043067~regulation of programmed cell death	7	1.77665	0.00045649	CDKN1A, RELA, UBC, NFKB1, HSPA1A, MYC, CUL1	19	812	13528	6.13793	0.261196	0.0143119	0.681236
GOTERM_BP_FAT	GO:0010941~regulation of cell death	7	1.77665	0.000465629	CDKN1A, RELA, UBC, NFKB1, HSPA1A, MYC, CUL1	19	815	13528	6.11534	0.265661	0.0139376	0.694829
GOTERM_BP_FAT	GO:0045449~regulation of transcription	11	2.79188	0.000650822	BMI1, SUMO1, AR, RELA, PPARG, UBC, TRIM27, MDM2, NFKB1, NEDD8, MYC	19	2601	13528	3.01115	0.350554	0.0178241	0.969927
GOTERM_BP_FAT	GO:0045941~positive regulation of transcription	6	1.52284	0.000674502	AR, RELA, PPARG, UBC, NFKB1, MYC	19	564	13528	7.57447	0.360677	0.0177347	1.00505
GOTERM_BP_FAT	GO:0010628~positive regulation of gene expression	6	1.52284	0.000772051	AR, RELA, PPARG, UBC, NFKB1, MYC	19	581	13528	7.35284	0.400745	0.0187868	1.14962
GOTERM_BP_FAT	GO:0045935~positive regulation of nucleobase, nucleoside, nucleotide and nucleic acid metabolic process	6	1.52284	0.00106632	AR, RELA, PPARG, UBC, NFKB1, MYC	19	624	13528	6.84615	0.50705	0.0240963	1.58455
SP_PIR_KEYWORDS	activator	5	1.26904	0.00119486	AR, RELA, PPARG, NFKB1, MYC	19	520	19235	9.73431	0.0923001	0.0120322	1.26608
GOTERM_BP_FAT	GO:0051173~positive regulation of nitrogen compound metabolic process	6	1.52284	0.00122879	AR, RELA, PPARG, UBC, NFKB1, MYC	19	644	13528	6.63354	0.557445	0.0268072	1.82392
GOTERM_BP_FAT	GO:0045944~positive regulation of transcription from RNA polymerase II promoter	5	1.26904	0.00125531	AR, RELA, PPARG, NFKB1, MYC	19	371	13528	9.59569	0.565168	0.0265068	1.86294
GOTERM_BP_FAT	GO:0051252~regulation of RNA metabolic process	9	2.28426	0.00128365	AR, RELA, PPARG, TRIM27, ELAVL1, MDM2, NFKB1, NEDD8, MYC	19	1813	13528	3.53447	0.573271	0.0262617	1.90461
GOTERM_BP_FAT	GO:0010557~positive regulation of macromolecule biosynthetic process	6	1.52284	0.00131666	AR, RELA, PPARG, UBC, NFKB1, MYC	19	654	13528	6.53211	0.582521	0.0261231	1.95314
GOTERM_BP_FAT	GO:0031328~positive regulation of cellular biosynthetic process	6	1.52284	0.00161908	AR, RELA, PPARG, UBC, NFKB1, MYC	19	685	13528	6.2365	0.658471	0.0311037	2.3967
GOTERM_BP_FAT	GO:0009891~positive regulation of biosynthetic process	6	1.52284	0.00172686	AR, RELA, PPARG, UBC, NFKB1, MYC	19	695	13528	6.14676	0.682063	0.0322099	2.55433
GOTERM_BP_FAT	GO:0043279~response to alkaloid	3	0.761421	0.00229683	RELA, PPARG, MYC	19	54	13528	39.5556	0.782281	0.0403668	3.38396
GOTERM_BP_FAT	GO:0016481~negative regulation of transcription	5	1.26904	0.00274077	SUMO1, PPARG, TRIM27, MDM2, NFKB1	19	459	13528	7.75599	0.837914	0.0467565	4.02557
GOTERM_BP_FAT	GO:0045893~positive regulation of transcription, DNA-dependent	5	1.26904	0.00315036	AR, RELA, PPARG, NFKB1, MYC	19	477	13528	7.46331	0.876558	0.0522274	4.61401
GOTERM_BP_FAT	GO:0051254~positive regulation of RNA metabolic process	5	1.26904	0.00324681	AR, RELA, PPARG, NFKB1, MYC	19	481	13528	7.40125	0.884229	0.0524764	4.75208
BIOCARTA	h_eponfkbPathway:Erythropoietin mediated neuroprotection through NF-kB	3	0.761421	0.00337388	CDKN1A, RELA, NFKB1	13	11	1437	30.1469	0.194501	0.194501	3.37506
SP_PIR_KEYWORDS	DNA binding	4	1.01523	0.0036679	RELA, PPARG, TRIM27, NFKB1	19	340	19235	11.9102	0.257436	0.0244987	3.84049
GOTERM_BP_FAT	GO:0045934~negative regulation of nucleobase, nucleoside, nucleotide and nucleic acid metabolic process	5	1.26904	0.00406441	SUMO1, PPARG, TRIM27, MDM2, NFKB1	19	512	13528	6.95312	0.932807	0.0637365	5.91505
GOTERM_BP_FAT	GO:0051172~negative regulation of nitrogen compound metabolic process	5	1.26904	0.00426683	SUMO1, PPARG, TRIM27, MDM2, NFKB1	19	519	13528	6.85934	0.941279	0.0652714	6.20093
GOTERM_BP_FAT	GO:0000122~negative regulation of transcription from RNA polymerase II promoter	4	1.01523	0.00492887	PPARG, TRIM27, MDM2, NFKB1	19	266	13528	10.7068	0.962218	0.0733544	7.13026
GOTERM_BP_FAT	GO:0010558~negative regulation of macromolecule biosynthetic process	5	1.26904	0.00514563	SUMO1, PPARG, TRIM27, MDM2, NFKB1	19	547	13528	6.50823	0.967299	0.0747909	7.43268
GOTERM_MF_FAT	GO:0043565~sequence-specific DNA binding	5	1.26904	0.00549026	AR, RELA, PPARG, NFKB1, MYC	17	607	12983	6.29082	0.39407	0.39407	5.82536
GOTERM_BP_FAT	GO:0006355~regulation of transcription, DNA-dependent	8	2.03046	0.00558958	AR, RELA, PPARG, TRIM27, MDM2, NFKB1, NEDD8, MYC	19	1773	13528	3.21263	0.975676	0.0776116	8.04917
GOTERM_BP_FAT	GO:0031327~negative regulation of cellular biosynthetic process	5	1.26904	0.00562803	SUMO1, PPARG, TRIM27, MDM2, NFKB1	19	561	13528	6.34581	0.976291	0.0765285	8.10237
GOTERM_BP_FAT	GO:0009890~negative regulation of biosynthetic process	5	1.26904	0.00606519	SUMO1, PPARG, TRIM27, MDM2, NFKB1	19	573	13528	6.21291	0.982287	0.0790188	8.70537
KEGG_PATHWAY	hsa05221:Acute myeloid leukemia	3	0.761421	0.00658333	RELA, NFKB1, MYC	12	58	5085	21.9181	0.276496	0.0525126	6.13658
GOTERM_MF_FAT	GO:0030528~transcription regulator activity	7	1.77665	0.00702814	AR, RELA, PPARG, UBC, MDM2, NFKB1, MYC	17	1512	12983	3.53568	0.473666	0.192603	7.40089
SP_PIR_KEYWORDS	acetylation	8	2.03046	0.00716897	CDKN1A, RELA, UBC, NFKB1, NEDD8, HSPA1A, NXF1, MYC	19	2635	19235	3.0736	0.441655	0.0438391	7.38113
GOTERM_BP_FAT	GO:0032868~response to insulin stimulus	3	0.761421	0.00766279	AR, RELA, PPARG	19	100	13528	21.36	0.993903	0.0969703	10.8778
SP_PIR_KEYWORDS	transcription regulation	7	1.77665	0.00823021	BMI1, AR, RELA, PPARG, TRIM27, NFKB1, MYC	19	2026	19235	3.49782	0.487987	0.0466896	8.43078
SP_PIR_KEYWORDS	Transcription	7	1.77665	0.00915247	BMI1, AR, RELA, PPARG, TRIM27, NFKB1, MYC	19	2071	19235	3.42182	0.525154	0.0484385	9.3342
GOTERM_BP_FAT	GO:0045892~negative regulation of transcription, DNA-dependent	4	1.01523	0.0109943	PPARG, TRIM27, MDM2, NFKB1	19	356	13528	8	0.999344	0.122682	15.2536
BIOCARTA	h_atmPathway:ATM Signaling Pathway	3	0.761421	0.0111773	CDKN1A, MDM2, NFKB1	13	20	1437	16.5808	0.512943	0.302105	10.7911
GOTERM_BP_FAT	GO:0051253~negative regulation of RNA metabolic process	4	1.01523	0.0115036	PPARG, TRIM27, MDM2, NFKB1	19	362	13528	7.8674	0.999534	0.125918	15.9046
GOTERM_BP_FAT	GO:0009725~response to hormone stimulus	4	1.01523	0.0119385	CDKN1A, AR, RELA, PPARG	19	367	13528	7.76022	0.999652	0.128283	16.4568
GOTERM_BP_FAT	GO:0009628~response to abiotic stimulus	4	1.01523	0.0120266	CDKN1A, RELA, PPARG, MYC	19	368	13528	7.73913	0.999672	0.127127	16.5683
BBID	99.NF-kB_activation	3	0.761421	0.0120626	RELA, NFKB1, MYC	5	17	358	12.6353	0.243556	0.243556	9.1712
GOTERM_BP_FAT	GO:0008219~cell death	5	1.26904	0.0133272	AR, UBC, NFKB1, MYC, CUL1	19	719	13528	4.95132	0.999863	0.135691	18.1975
KEGG_PATHWAY	hsa05222:Small cell lung cancer	3	0.761421	0.0134638	RELA, NFKB1, MYC	12	84	5085	15.1339	0.485318	0.0905239	12.1876
GOTERM_BP_FAT	GO:0016265~death	5	1.26904	0.013645	AR, UBC, NFKB1, MYC, CUL1	19	724	13528	4.91713	0.999889	0.136635	18.5911
GOTERM_BP_FAT	GO:0009719~response to endogenous stimulus	4	1.01523	0.0155568	CDKN1A, AR, RELA, PPARG	19	405	13528	7.0321	0.999969	0.152109	20.9216
BIOCARTA	h_RacCycDPathway:Influence of Ras and Rho proteins on G1 to S Transition	3	0.761421	0.0159373	CDKN1A, RELA, NFKB1	13	24	1437	13.8173	0.64235	0.290173	15.0588
KEGG_PATHWAY	hsa04010:MAPK signaling pathway	4	1.01523	0.0172471	RELA, NFKB1, HSPA1A, MYC	12	267	5085	6.34831	0.573643	0.101079	15.3637
GOTERM_BP_FAT	GO:0043434~response to peptide hormone stimulus	3	0.761421	0.017481	AR, RELA, PPARG	19	154	13528	13.8701	0.999992	0.164632	23.2044
GOTERM_BP_FAT	GO:0001817~regulation of cytokine production	3	0.761421	0.023666	RELA, PPARG, NFKB1	19	181	13528	11.8011	1	0.200406	30.1321
SP_PIR_KEYWORDS	dna-binding	6	1.52284	0.025105	AR, RELA, PPARG, TRIM27, NFKB1, MYC	19	1868	19235	3.25172	0.872478	0.108112	23.7359
GOTERM_BP_FAT	GO:0051248~negative regulation of protein metabolic process	3	0.761421	0.0251473	RELA, UBC, NFKB1	19	187	13528	11.4225	1	0.209054	31.7023
GOTERM_BP_FAT	GO:0051960~regulation of nervous system development	3	0.761421	0.0264103	RELA, PPARG, UBC	19	192	13528	11.125	1	0.215797	33.015
GOTERM_MF_FAT	GO:0003700~transcription factor activity	5	1.26904	0.0277602	AR, RELA, PPARG, NFKB1, MYC	17	975	12983	3.91644	0.922842	0.347526	26.429
GOTERM_BP_FAT	GO:0009314~response to radiation	3	0.761421	0.0284842	CDKN1A, RELA, MYC	19	200	13528	10.68	1	0.228106	35.1198
GOTERM_BP_FAT	GO:0060284~regulation of cell development	3	0.761421	0.0298132	RELA, PPARG, UBC	19	205	13528	10.4195	1	0.234753	36.4359
GOTERM_BP_FAT	GO:0045597~positive regulation of cell differentiation	3	0.761421	0.0365305	RELA, PPARG, NFKB1	19	229	13528	9.32751	1	0.268251	42.7152
GOTERM_BP_FAT	GO:0006350~transcription	7	1.77665	0.0484954	BMI1, AR, RELA, PPARG, TRIM27, NFKB1, MYC	19	2101	13528	2.3722	1	0.315338	52.4894
GOTERM_BP_FAT	GO:0051094~positive regulation of developmental process	3	0.761421	0.0518587	RELA, PPARG, NFKB1	19	278	13528	7.68345	1	0.324491	54.9425
GOTERM_BP_FAT	GO:0006351~transcription, DNA-dependent	3	0.761421	0.0566033	AR, NFKB1, MYC	19	292	13528	7.31507	1	0.342896	58.2026
GOTERM_MF_FAT	GO:0016564~transcription repressor activity	3	0.761421	0.0566138	PPARG, MDM2, NFKB1	17	316	12983	7.25037	0.995026	0.411597	47.0254
GOTERM_BP_FAT	GO:0032774~RNA biosynthetic process	3	0.761421	0.0579867	AR, NFKB1, MYC	19	296	13528	7.21622	1	0.346792	59.1108
GOTERM_CC_FAT	GO:0012505~endomembrane system	4	1.01523	0.0598186	SUMO1, TRIM27, MDM2, NXF1	16	782	12782	4.08632	0.98667	0.350646	47.1842
GOTERM_MF_FAT	GO:0046983~protein dimerization activity	3	0.761421	0.142136	AR, PPARG, NFKB1	17	542	12983	4.22715	0.999999	0.687326	81.201
GOTERM_MF_FAT	GO:0003677~DNA binding	6	1.52284	0.144455	AR, RELA, PPARG, TRIM27, NFKB1, MYC	17	2331	12983	1.96578	0.999999	0.664493	81.7476
GOTERM_BP_FAT	GO:0006952~defense response	3	0.761421	0.196122	RELA, PPARG, NFKB1	19	615	13528	3.47317	1	0.754687	96.1928
GOTERM_CC_FAT	GO:0031090~organelle membrane	3	0.761421	0.372783	SUMO1, TRIM27, MDM2	16	1096	12782	2.1867	1	0.918872	99.1993
SP_PIR_KEYWORDS	alternative splicing	8	2.03046	0.589732	AR, RELA, PPARG, TRIM27, MDM2, NFKB1, PARK2, MYC	19	7488	19235	1.08159	1	0.962383	99.9925
UP_SEQ_FEATURE	splice variant	8	2.03046	0.592858	AR, RELA, PPARG, TRIM27, MDM2, NFKB1, PARK2, MYC	19	7458	19113	1.07905	1	1	99.9969
Annotation Cluster 5	Enrichment Score: 2.2550059382780856
Category	Term	Count	%	p Value	Genes	List Total	Pop Hits	Pop Total	Fold Enrichment	Bonferroni	Benjamini	FDR
GOTERM_BP_FAT	GO:0044092~negative regulation of molecular function	5	1.26904	0.000848965	SUMO1, CDKN1A, PPARG, UBC, NFKB1	19	334	13528	10.6587	0.430561	0.0199099	1.26347
GOTERM_CC_FAT	GO:0005829~cytosol	7	1.77665	0.00274193	CDKN1A, RELA, PPARG, UBC, MDM2, NFKB1, CUL1	16	1330	12782	4.20461	0.174857	0.0315255	2.80157
GOTERM_BP_FAT	GO:0043086~negative regulation of catalytic activity	4	1.01523	0.00551773	CDKN1A, PPARG, UBC, NFKB1	19	277	13528	10.2816	0.974482	0.0782855	7.94966
GOTERM_BP_FAT	GO:0040008~regulation of growth	3	0.761421	0.0743479	CDKN1A, PPARG, UBC	19	341	13528	6.26393	1	0.413484	68.5449
Annotation Cluster 6	Enrichment Score: 2.1570220675498555
Category	Term	Count	%	p Value	Genes	List Total	Pop Hits	Pop Total	Fold Enrichment	Bonferroni	Benjamini	FDR
SP_PIR_KEYWORDS	zinc finger	4	1.01523	0.000368867	AR, PPARG, UBC, TRIM27	19	153	19235	26.4671	0.0294416	0.00595892	0.392414
SP_PIR_KEYWORDS	zinc-finger	8	2.03046	0.000588733	BMI1, CDKN1A, AR, PPARG, UBC, TRIM27, MDM2, PARK2	19	1718	19235	4.71417	0.0465815	0.00791871	0.625651
SP_PIR_KEYWORDS	zinc	8	2.03046	0.00249629	BMI1, CDKN1A, AR, PPARG, UBC, TRIM27, MDM2, PARK2	19	2189	19235	3.69984	0.183274	0.0200416	2.62854
INTERPRO	IPR017907:Zinc finger, RING-type, conserved site	4	1.01523	0.00317927	BMI1, TRIM27, MDM2, PARK2	19	280	16659	12.5256	0.202352	0.0549542	3.25105
GOTERM_MF_FAT	GO:0043167~ion binding	11	2.79188	0.0136505	BMI1, SRPK2, CDKN1A, AR, RELA, PPARG, UBC, TRIM27, MDM2, ITGA4, PARK2	17	4241	12983	1.98085	0.713711	0.268522	13.9156
SP_PIR_KEYWORDS	metal-binding	8	2.03046	0.0138115	BMI1, CDKN1A, AR, PPARG, UBC, TRIM27, MDM2, PARK2	19	2972	19235	2.72508	0.675843	0.0679864	13.7758
GOTERM_MF_FAT	GO:0008270~zinc ion binding	8	2.03046	0.014355	BMI1, CDKN1A, AR, PPARG, UBC, TRIM27, MDM2, PARK2	17	2311	12983	2.64372	0.731732	0.231376	14.5835
GOTERM_MF_FAT	GO:0046872~metal ion binding	10	2.53807	0.0378442	BMI1, SRPK2, CDKN1A, AR, PPARG, UBC, TRIM27, MDM2, ITGA4, PARK2	17	4140	12983	1.8447	0.970123	0.394394	34.3337
GOTERM_MF_FAT	GO:0046914~transition metal ion binding	8	2.03046	0.0379662	BMI1, CDKN1A, AR, PPARG, UBC, TRIM27, MDM2, PARK2	17	2785	12983	2.19377	0.970466	0.356142	34.4244
GOTERM_MF_FAT	GO:0043169~cation binding	10	2.53807	0.0401405	BMI1, SRPK2, CDKN1A, AR, PPARG, UBC, TRIM27, MDM2, ITGA4, PARK2	17	4179	12983	1.82748	0.975962	0.339155	36.0222
Annotation Cluster 7	Enrichment Score: 1.9916093356883988
Category	Term	Count	%	p Value	Genes	List Total	Pop Hits	Pop Total	Fold Enrichment	Bonferroni	Benjamini	FDR
GOTERM_BP_FAT	GO:0010033~response to organic substance	7	1.77665	0.000239818	CDKN1A, AR, RELA, PPARG, NEDD8, HSPA1A, MYC	19	721	13528	6.91262	0.147019	0.0105452	0.35843
GOTERM_BP_FAT	GO:0014070~response to organic cyclic substance	4	1.01523	0.000516354	CDKN1A, RELA, PPARG, NEDD8	19	121	13528	23.5372	0.289958	0.014778	0.77025
GOTERM_BP_FAT	GO:0009725~response to hormone stimulus	4	1.01523	0.0119385	CDKN1A, AR, RELA, PPARG	19	367	13528	7.76022	0.999652	0.128283	16.4568
GOTERM_BP_FAT	GO:0009628~response to abiotic stimulus	4	1.01523	0.0120266	CDKN1A, RELA, PPARG, MYC	19	368	13528	7.73913	0.999672	0.127127	16.5683
GOTERM_BP_FAT	GO:0009719~response to endogenous stimulus	4	1.01523	0.0155568	CDKN1A, AR, RELA, PPARG	19	405	13528	7.0321	0.999969	0.152109	20.9216
GOTERM_BP_FAT	GO:0048545~response to steroid hormone stimulus	3	0.761421	0.0264103	CDKN1A, RELA, PPARG	19	192	13528	11.125	1	0.215797	33.015
GOTERM_BP_FAT	GO:0008361~regulation of cell size	3	0.761421	0.030082	CDKN1A, AR, PPARG	19	206	13528	10.3689	1	0.233909	36.699
GOTERM_BP_FAT	GO:0042493~response to drug	3	0.761421	0.0328235	CDKN1A, RELA, PPARG	19	216	13528	9.88889	1	0.249763	39.3254
GOTERM_BP_FAT	GO:0009991~response to extracellular stimulus	3	0.761421	0.0339471	CDKN1A, RELA, PPARG	19	220	13528	9.70909	1	0.254397	40.3722
GOTERM_BP_FAT	GO:0032535~regulation of cellular component size	3	0.761421	0.0495447	CDKN1A, AR, PPARG	19	271	13528	7.88192	1	0.318077	53.2678
Annotation Cluster 8	Enrichment Score: 1.9351960831672408
Category	Term	Count	%	p Value	Genes	List Total	Pop Hits	Pop Total	Fold Enrichment	Bonferroni	Benjamini	FDR
SP_PIR_KEYWORDS	Proto-oncogene	4	1.01523	0.00120582	BMI1, TRIM27, MDM2, MYC	19	230	19235	17.6064	0.0931065	0.0108002	1.27762
INTERPRO	IPR017907:Zinc finger, RING-type, conserved site	4	1.01523	0.00317927	BMI1, TRIM27, MDM2, PARK2	19	280	16659	12.5256	0.202352	0.0549542	3.25105
UP_SEQ_FEATURE	zinc finger region:RING-type	3	0.761421	0.016374	BMI1, TRIM27, MDM2	19	210	19113	14.3707	0.873016	0.403051	17.38
INTERPRO	IPR001841:Zinc finger, RING-type	3	0.761421	0.03992	BMI1, TRIM27, MDM2	19	296	16659	8.88638	0.94456	0.439255	34.4813
SMART	SM00184:RING	3	0.761421	0.084152	BMI1, TRIM27, MDM2	16	296	9079	5.75106	0.794495	0.546674	47.6892
Annotation Cluster 9	Enrichment Score: 1.9188841475428107
Category	Term	Count	%	p Value	Genes	List Total	Pop Hits	Pop Total	Fold Enrichment	Bonferroni	Benjamini	FDR
GOTERM_BP_FAT	GO:0010604~positive regulation of macromolecule metabolic process	8	2.03046	6.85392e-05	AR, RELA, PPARG, UBC, MDM2, NFKB1, MYC, CUL1	19	857	13528	6.64644	0.044426	0.004534	0.102561
GOTERM_BP_FAT	GO:0006511~ubiquitin-dependent protein catabolic process	5	1.26904	0.00025091	UBC, MDM2, NEDD8, PARK2, CUL1	19	242	13528	14.7107	0.153271	0.0103445	0.374979
GOTERM_BP_FAT	GO:0042981~regulation of apoptosis	7	1.77665	0.000432812	CDKN1A, RELA, UBC, NFKB1, HSPA1A, MYC, CUL1	19	804	13528	6.199	0.249501	0.0142483	0.646006
GOTERM_BP_FAT	GO:0043067~regulation of programmed cell death	7	1.77665	0.00045649	CDKN1A, RELA, UBC, NFKB1, HSPA1A, MYC, CUL1	19	812	13528	6.13793	0.261196	0.0143119	0.681236
GOTERM_BP_FAT	GO:0010941~regulation of cell death	7	1.77665	0.000465629	CDKN1A, RELA, UBC, NFKB1, HSPA1A, MYC, CUL1	19	815	13528	6.11534	0.265661	0.0139376	0.694829
KEGG_PATHWAY	hsa04110:Cell cycle	4	1.01523	0.00207119	CDKN1A, MDM2, MYC, CUL1	12	125	5085	13.56	0.0966033	0.0250785	1.96828
GOTERM_BP_FAT	GO:0008629~induction of apoptosis by intracellular signals	3	0.761421	0.00229683	CDKN1A, MYC, CUL1	19	54	13528	39.5556	0.782281	0.0403668	3.38396
GOTERM_BP_FAT	GO:0022402~cell cycle process	5	1.26904	0.00577129	CDKN1A, UBC, MDM2, MYC, CUL1	19	565	13528	6.30088	0.978451	0.0768346	8.30039
GOTERM_BP_FAT	GO:0007050~cell cycle arrest	3	0.761421	0.00811271	CDKN1A, MYC, CUL1	19	103	13528	20.7379	0.995486	0.100481	11.4808
GOTERM_BP_FAT	GO:0051329~interphase of mitotic cell cycle	3	0.761421	0.00811271	CDKN1A, MDM2, CUL1	19	103	13528	20.7379	0.995486	0.100481	11.4808
GOTERM_BP_FAT	GO:0006917~induction of apoptosis	4	1.01523	0.00821985	CDKN1A, UBC, MYC, CUL1	19	320	13528	8.9	0.995798	0.0998881	11.6238
GOTERM_BP_FAT	GO:0012502~induction of programmed cell death	4	1.01523	0.0082905	CDKN1A, UBC, MYC, CUL1	19	321	13528	8.87227	0.995992	0.0989024	11.718
GOTERM_BP_FAT	GO:0051325~interphase	3	0.761421	0.00857433	CDKN1A, MDM2, CUL1	19	106	13528	20.1509	0.996685	0.10033	12.0955
GOTERM_BP_FAT	GO:0000278~mitotic cell cycle	4	1.01523	0.012204	CDKN1A, UBC, MDM2, CUL1	19	370	13528	7.6973	0.999709	0.126881	16.7922
GOTERM_BP_FAT	GO:0008219~cell death	5	1.26904	0.0133272	AR, UBC, NFKB1, MYC, CUL1	19	719	13528	4.95132	0.999863	0.135691	18.1975
GOTERM_BP_FAT	GO:0016265~death	5	1.26904	0.013645	AR, UBC, NFKB1, MYC, CUL1	19	724	13528	4.91713	0.999889	0.136635	18.5911
GOTERM_BP_FAT	GO:0007049~cell cycle	5	1.26904	0.0172455	CDKN1A, UBC, MDM2, MYC, CUL1	19	776	13528	4.58763	0.99999	0.164906	22.9283
GOTERM_BP_FAT	GO:0043065~positive regulation of apoptosis	4	1.01523	0.0182438	CDKN1A, UBC, MYC, CUL1	19	430	13528	6.62326	0.999995	0.168862	24.0921
GOTERM_BP_FAT	GO:0043068~positive regulation of programmed cell death	4	1.01523	0.0185828	CDKN1A, UBC, MYC, CUL1	19	433	13528	6.57737	0.999996	0.169408	24.4836
GOTERM_BP_FAT	GO:0010942~positive regulation of cell death	4	1.01523	0.0188108	CDKN1A, UBC, MYC, CUL1	19	435	13528	6.54713	0.999997	0.169022	24.7457
GOTERM_BP_FAT	GO:0008283~cell proliferation	4	1.01523	0.0189253	AR, TRIM27, MYC, CUL1	19	436	13528	6.53211	0.999997	0.167724	24.8772
GOTERM_BP_FAT	GO:0032268~regulation of cellular protein metabolic process	4	1.01523	0.023574	UBC, MDM2, NFKB1, CUL1	19	474	13528	6.00844	1	0.202245	30.0334
GOTERM_BP_FAT	GO:0032270~positive regulation of cellular protein metabolic process	3	0.761421	0.0377027	UBC, MDM2, CUL1	19	233	13528	9.16738	1	0.272764	43.7499
GOTERM_BP_FAT	GO:0044093~positive regulation of molecular function	4	1.01523	0.0406333	RELA, UBC, MYC, CUL1	19	586	13528	4.86007	1	0.284945	46.2606
GOTERM_BP_FAT	GO:0051247~positive regulation of protein metabolic process	3	0.761421	0.040697	UBC, MDM2, CUL1	19	243	13528	8.79012	1	0.282431	46.314
GOTERM_BP_FAT	GO:0006915~apoptosis	4	1.01523	0.0434775	UBC, NFKB1, MYC, CUL1	19	602	13528	4.7309	1	0.295907	48.597
GOTERM_BP_FAT	GO:0012501~programmed cell death	4	1.01523	0.0451215	UBC, NFKB1, MYC, CUL1	19	611	13528	4.66121	1	0.302418	49.9039
GOTERM_BP_FAT	GO:0065003~macromolecular complex assembly	4	1.01523	0.0556444	SRPK2, TRIM27, MDM2, MYC	19	665	13528	4.28271	1	0.341062	57.562
GOTERM_BP_FAT	GO:0043933~macromolecular complex subunit organization	4	1.01523	0.0652581	SRPK2, TRIM27, MDM2, MYC	19	710	13528	4.01127	1	0.378726	63.5895
GOTERM_BP_FAT	GO:0022403~cell cycle phase	3	0.761421	0.10362	CDKN1A, MDM2, CUL1	19	414	13528	5.15942	1	0.519336	80.5571
GOTERM_BP_FAT	GO:0043085~positive regulation of catalytic activity	3	0.761421	0.150736	UBC, MYC, CUL1	19	520	13528	4.10769	1	0.657855	91.3364
GOTERM_CC_FAT	GO:0043232~intracellular non-membrane-bounded organelle	4	1.01523	0.613632	SRPK2, UBC, MDM2, MYC	16	2596	12782	1.23093	1	0.99139	99.9947
GOTERM_CC_FAT	GO:0043228~non-membrane-bounded organelle	4	1.01523	0.613632	SRPK2, UBC, MDM2, MYC	16	2596	12782	1.23093	1	0.99139	99.9947
Annotation Cluster 10	Enrichment Score: 1.4086242896081775
Category	Term	Count	%	p Value	Genes	List Total	Pop Hits	Pop Total	Fold Enrichment	Bonferroni	Benjamini	FDR
SP_PIR_KEYWORDS	Proto-oncogene	4	1.01523	0.00120582	BMI1, TRIM27, MDM2, MYC	19	230	19235	17.6064	0.0931065	0.0108002	1.27762
GOTERM_BP_FAT	GO:0065003~macromolecular complex assembly	4	1.01523	0.0556444	SRPK2, TRIM27, MDM2, MYC	19	665	13528	4.28271	1	0.341062	57.562
GOTERM_BP_FAT	GO:0043933~macromolecular complex subunit organization	4	1.01523	0.0652581	SRPK2, TRIM27, MDM2, MYC	19	710	13528	4.01127	1	0.378726	63.5895
GOTERM_BP_FAT	GO:0070271~protein complex biogenesis	3	0.761421	0.143804	TRIM27, MDM2, MYC	19	505	13528	4.2297	1	0.642759	90.2151
GOTERM_BP_FAT	GO:0006461~protein complex assembly	3	0.761421	0.143804	TRIM27, MDM2, MYC	19	505	13528	4.2297	1	0.642759	90.2151
Annotation Cluster 11	Enrichment Score: 1.3472111688764234
Category	Term	Count	%	p Value	Genes	List Total	Pop Hits	Pop Total	Fold Enrichment	Bonferroni	Benjamini	FDR
GOTERM_BP_FAT	GO:0030097~hemopoiesis	3	0.761421	0.0385916	BMI1, PPARG, ITGA4	19	236	13528	9.05085	1	0.2754	44.5227
GOTERM_BP_FAT	GO:0048534~hemopoietic or lymphoid organ development	3	0.761421	0.0459895	BMI1, PPARG, ITGA4	19	260	13528	8.21538	1	0.304385	50.5814
GOTERM_BP_FAT	GO:0002520~immune system development	3	0.761421	0.0511936	BMI1, PPARG, ITGA4	19	276	13528	7.73913	1	0.323939	54.4669
Annotation Cluster 12	Enrichment Score: 0.7406045826060768
Category	Term	Count	%	p Value	Genes	List Total	Pop Hits	Pop Total	Fold Enrichment	Bonferroni	Benjamini	FDR
GOTERM_CC_FAT	GO:0005635~nuclear envelope	3	0.761421	0.02343	SUMO1, TRIM27, NXF1	16	205	12782	11.6909	0.809789	0.187348	21.7582
GOTERM_CC_FAT	GO:0012505~endomembrane system	4	1.01523	0.0598186	SUMO1, TRIM27, MDM2, NXF1	16	782	12782	4.08632	0.98667	0.350646	47.1842
GOTERM_CC_FAT	GO:0031967~organelle envelope	3	0.761421	0.16287	SUMO1, TRIM27, NXF1	16	620	12782	3.86552	0.999996	0.677387	84.1156
GOTERM_CC_FAT	GO:0031975~envelope	3	0.761421	0.163706	SUMO1, TRIM27, NXF1	16	622	12782	3.85309	0.999996	0.647553	84.279
GOTERM_CC_FAT	GO:0016021~integral to membrane	4	1.01523	0.979095	SUMO1, TRIM27, ITGA4, NXF1	16	5297	12782	0.603266	1	1	100
GOTERM_CC_FAT	GO:0031224~intrinsic to membrane	4	1.01523	0.984084	SUMO1, TRIM27, ITGA4, NXF1	16	5485	12782	0.582589	1	1	100

## Sheet: KEGG_8 h
Table S4. KEGG (8 h).
Category	Term	Count	%	p Value	Genes	List Total	Pop Hits	Pop Total	Fold Enrichment	Bonferroni	Benjamini	FDR
KEGG_PATHWAY	hsa04120:Ubiquitin mediated proteolysis	3	0.761421	0.0337986	MDM2, PARK2, CUL1	12	137	5085	9.2792	0.814512	0.170719	28.0834
KEGG_PATHWAY	hsa05220:Chronic myeloid leukemia	5	1.26904	1.33e-05	CDKN1A, RELA, MDM2, NFKB1, MYC	12	75	5085	28.25	0.000653	0.000653	0.0127752
KEGG_PATHWAY	hsa05200:Pathways in cancer	7	1.77665	2.41e-05	CDKN1A, AR, RELA, PPARG, MDM2, NFKB1, MYC	12	328	5085	9.04345	0.0011812	0.000591	0.0231239
KEGG_PATHWAY	hsa05215:Prostate cancer	5	1.26904	2.64e-05	CDKN1A, AR, RELA, MDM2, NFKB1	12	89	5085	23.8062	0.00129052	0.00043	0.0252651
KEGG_PATHWAY	hsa04110:Cell cycle	4	1.01523	0.00207119	CDKN1A, MDM2, MYC, CUL1	12	125	5085	13.56	0.0966033	0.0250785	1.96828
KEGG_PATHWAY	hsa05219:Bladder cancer	3	0.761421	0.00349448	CDKN1A, MDM2, MYC	12	42	5085	30.2679	0.157624	0.0337241	3.30066
KEGG_PATHWAY	hsa05220:Chronic myeloid leukemia	5	1.26904	1.33e-05	CDKN1A, RELA, MDM2, NFKB1, MYC	12	75	5085	28.25	0.000653	0.000653	0.0127752
KEGG_PATHWAY	hsa05200:Pathways in cancer	7	1.77665	2.41e-05	CDKN1A, AR, RELA, PPARG, MDM2, NFKB1, MYC	12	328	5085	9.04345	0.0011812	0.000591	0.0231239
KEGG_PATHWAY	hsa05215:Prostate cancer	5	1.26904	2.64e-05	CDKN1A, AR, RELA, MDM2, NFKB1	12	89	5085	23.8062	0.00129052	0.00043	0.0252651
KEGG_PATHWAY	hsa05221:Acute myeloid leukemia	3	0.761421	0.00658333	RELA, NFKB1, MYC	12	58	5085	21.9181	0.276496	0.0525126	6.13658
KEGG_PATHWAY	hsa05222:Small cell lung cancer	3	0.761421	0.0134638	RELA, NFKB1, MYC	12	84	5085	15.1339	0.485318	0.0905239	12.1876
KEGG_PATHWAY	hsa04010:MAPK signaling pathway	4	1.01523	0.0172471	RELA, NFKB1, HSPA1A, MYC	12	267	5085	6.34831	0.573643	0.101079	15.3637
KEGG_PATHWAY	hsa04110:Cell cycle	4	1.01523	0.00207119	CDKN1A, MDM2, MYC, CUL1	12	125	5085	13.56	0.0966033	0.0250785	1.96828

## Sheet: David_Ori_24 h
Table S5. David (24 h).
Annotation Cluster 1	Enrichment Score: 3.2601566302318523
Category	Term	Count	%	p Value	Genes	List Total	Pop Hits	Pop Total	Fold Enrichment	Bonferroni	Benjamini	FDR
GOTERM_BP_FAT	GO:0031399~regulation of protein modification process	7	2.85714	2.1832e-06	EGFR, MDFI, APOA1, LYN, MAP3K1, UBC, STUB1	20	295	13528	16.0502	0.00176247	0.00176247	0.00335555
GOTERM_BP_FAT	GO:0044093~positive regulation of molecular function	8	3.26531	8.82338e-06	EGFR, MDFI, HDAC5, APOA1, MAP3K1, UBC, SHC1, MYC	20	586	13528	9.23413	0.00710397	0.00355832	0.0135608
GOTERM_BP_FAT	GO:0042325~regulation of phosphorylation	7	2.85714	2.9947e-05	EGFR, MDFI, CDKN1A, APOA1, LYN, MAP3K1, SHC1	20	466	13528	10.1605	0.0239072	0.00803342	0.046019
GOTERM_BP_FAT	GO:0032268~regulation of cellular protein metabolic process	7	2.85714	3.29624e-05	EGFR, MDFI, APOA1, LYN, MAP3K1, UBC, STUB1	20	474	13528	9.98903	0.0262825	0.0066364	0.0506516
GOTERM_BP_FAT	GO:0051174~regulation of phosphorus metabolic process	7	2.85714	3.75048e-05	EGFR, MDFI, CDKN1A, APOA1, LYN, MAP3K1, SHC1	20	485	13528	9.76247	0.0298499	0.00604256	0.0576297
GOTERM_BP_FAT	GO:0019220~regulation of phosphate metabolic process	7	2.85714	3.75048e-05	EGFR, MDFI, CDKN1A, APOA1, LYN, MAP3K1, SHC1	20	485	13528	9.76247	0.0298499	0.00604256	0.0576297
GOTERM_BP_FAT	GO:0043085~positive regulation of catalytic activity	7	2.85714	5.54296e-05	EGFR, MDFI, APOA1, MAP3K1, UBC, SHC1, MYC	20	520	13528	9.10538	0.0438001	0.00743693	0.0851619
GOTERM_BP_FAT	GO:0001932~regulation of protein amino acid phosphorylation	5	2.04082	8.6174e-05	EGFR, MDFI, APOA1, LYN, MAP3K1	20	173	13528	19.5491	0.0672627	0.00989806	0.132368
GOTERM_BP_FAT	GO:0000165~MAPKKK cascade	5	2.04082	0.000109425	EGFR, MDFI, GRB2, MAP3K1, SHC1	20	184	13528	18.3804	0.0846241	0.00880307	0.168056
GOTERM_BP_FAT	GO:0051338~regulation of transferase activity	6	2.44898	0.000129457	EGFR, MDFI, CDKN1A, APOA1, MAP3K1, SHC1	20	372	13528	10.9097	0.0993222	0.00801446	0.198791
GOTERM_BP_FAT	GO:0051347~positive regulation of transferase activity	5	2.04082	0.000303626	EGFR, MDFI, APOA1, MAP3K1, SHC1	20	240	13528	14.0917	0.217583	0.013539	0.465659
GOTERM_BP_FAT	GO:0043406~positive regulation of MAP kinase activity	4	1.63265	0.000369384	EGFR, MDFI, MAP3K1, SHC1	20	102	13528	26.5255	0.258083	0.0134773	0.566243
BIOCARTA	h_egfPathway:EGF Signaling Pathway	4	1.63265	0.000580872	EGFR, GRB2, MAP3K1, SHC1	11	26	1437	20.0979	0.0548021	0.0277871	0.639165
BIOCARTA	h_At1rPathway:Angiotensin II mediated activation of JNK Pathway via Pyk2 dependent signaling	4	1.63265	0.000651071	EGFR, GRB2, MAP3K1, SHC1	11	27	1437	19.3535	0.0612203	0.020838	0.716157
GOTERM_BP_FAT	GO:0043405~regulation of MAP kinase activity	4	1.63265	0.000950357	EGFR, MDFI, MAP3K1, SHC1	20	141	13528	19.1887	0.536177	0.0244778	1.45078
GOTERM_BP_FAT	GO:0007242~intracellular signaling cascade	8	3.26531	0.00108223	EGFR, MDFI, APOA1, LYN, GRB2, MAP3K1, RHOA, SHC1	20	1256	13528	4.30828	0.583102	0.0246877	1.65052
GOTERM_BP_FAT	GO:0007167~enzyme linked receptor protein signaling pathway	5	2.04082	0.00115155	EGFR, GRB2, MAP3K1, SHC1, STUB1	20	342	13528	9.88889	0.605835	0.0255292	1.75537
GOTERM_BP_FAT	GO:0045859~regulation of protein kinase activity	5	2.04082	0.00118947	EGFR, MDFI, CDKN1A, MAP3K1, SHC1	20	345	13528	9.8029	0.617745	0.0249895	1.81269
GOTERM_BP_FAT	GO:0043549~regulation of kinase activity	5	2.04082	0.00135003	EGFR, MDFI, CDKN1A, MAP3K1, SHC1	20	357	13528	9.47339	0.664309	0.0262722	2.05501
GOTERM_BP_FAT	GO:0007243~protein kinase cascade	5	2.04082	0.00154058	EGFR, MDFI, GRB2, MAP3K1, SHC1	20	370	13528	9.14054	0.712274	0.0261571	2.34185
GOTERM_BP_FAT	GO:0006468~protein amino acid phosphorylation	6	2.44898	0.00187298	EGFR, MDFI, LYN, MAP3K1, SHC1, CDK2	20	667	13528	6.08456	0.780144	0.030441	2.84037
GOTERM_MF_FAT	GO:0019899~enzyme binding	5	2.04082	0.00249221	EGFR, APOA1, LYN, MAP3K1, STUB1	16	523	12983	7.75753	0.284213	0.284213	2.87933
GOTERM_BP_FAT	GO:0045860~positive regulation of protein kinase activity	4	1.63265	0.00352351	EGFR, MDFI, MAP3K1, SHC1	20	223	13528	12.1327	0.942273	0.0523896	5.2807
GOTERM_BP_FAT	GO:0033674~positive regulation of kinase activity	4	1.63265	0.00389062	EGFR, MDFI, MAP3K1, SHC1	20	231	13528	11.7126	0.957137	0.0556593	5.81562
GOTERM_BP_FAT	GO:0016310~phosphorylation	6	2.44898	0.00414241	EGFR, MDFI, LYN, MAP3K1, SHC1, CDK2	20	800	13528	5.073	0.965056	0.0571446	6.18088
GOTERM_BP_FAT	GO:0000187~activation of MAPK activity	3	1.22449	0.00580489	MDFI, MAP3K1, SHC1	20	82	13528	24.7463	0.990941	0.0754058	8.55951
GOTERM_BP_FAT	GO:0006796~phosphate metabolic process	6	2.44898	0.00947152	EGFR, MDFI, LYN, MAP3K1, SHC1, CDK2	20	973	13528	4.17102	0.999542	0.108427	13.6077
GOTERM_BP_FAT	GO:0006793~phosphorus metabolic process	6	2.44898	0.00947152	EGFR, MDFI, LYN, MAP3K1, SHC1, CDK2	20	973	13528	4.17102	0.999542	0.108427	13.6077
GOTERM_MF_FAT	GO:0008289~lipid binding	4	1.63265	0.0137935	APOA1, LYN, MAP3K1, SHC1	16	450	12983	7.21278	0.844513	0.462269	15.0088
GOTERM_BP_FAT	GO:0007166~cell surface receptor linked signal transduction	7	2.85714	0.0366099	EGFR, APOA1, LYN, GRB2, MAP3K1, SHC1, STUB1	20	1856	13528	2.55108	1	0.264723	43.6313
Annotation Cluster 2	Enrichment Score: 3.2243373183030957
Category	Term	Count	%	p Value	Genes	List Total	Pop Hits	Pop Total	Fold Enrichment	Bonferroni	Benjamini	FDR
KEGG_PATHWAY	hsa04012:ErbB signaling pathway	5	2.04082	7.02217e-05	EGFR, CDKN1A, GRB2, SHC1, MYC	15	87	5085	19.4828	0.00357503	0.00357503	0.0679116
GOTERM_BP_FAT	GO:0010033~response to organic substance	7	2.85714	0.000334804	EGFR, HDAC5, CDKN1A, LYN, GRB2, SHC1, MYC	20	721	13528	6.56699	0.237053	0.0141394	0.513361
KEGG_PATHWAY	hsa05214:Glioma	4	1.63265	0.000598621	EGFR, CDKN1A, GRB2, SHC1	15	63	5085	21.5238	0.0300772	0.010128	0.577602
KEGG_PATHWAY	hsa05220:Chronic myeloid leukemia	4	1.63265	0.000998188	CDKN1A, GRB2, SHC1, MYC	15	75	5085	18.08	0.0496577	0.0126525	0.961474
GOTERM_BP_FAT	GO:0009725~response to hormone stimulus	5	2.04082	0.00149503	HDAC5, CDKN1A, LYN, GRB2, SHC1	20	367	13528	9.21526	0.701471	0.0265065	2.27335
GOTERM_BP_FAT	GO:0009719~response to endogenous stimulus	5	2.04082	0.00214635	HDAC5, CDKN1A, LYN, GRB2, SHC1	20	405	13528	8.35062	0.823796	0.0341264	3.24857
Annotation Cluster 3	Enrichment Score: 3.053152033012326
Category	Term	Count	%	p Value	Genes	List Total	Pop Hits	Pop Total	Fold Enrichment	Bonferroni	Benjamini	FDR
INTERPRO	IPR000626:Ubiquitin	4	1.63265	1.5618e-05	SUMO1, ISG15, UBC, UBD	19	46	16659	76.2426	0.00104587	0.00104587	0.0160172
UP_SEQ_FEATURE	cross-link:Glycyl lysine isopeptide (Gly-Lys) (interchain with K-? in acceptor proteins)	3	1.22449	5.12195e-05	SUMO1, ISG15, UBC	20	11	19113	260.632	0.00775534	0.00775534	0.0612875
SMART	SM00213:UBQ	4	1.63265	5.30796e-05	SUMO1, ISG15, UBC, UBD	16	46	9079	49.3424	0.000955003	0.000955003	0.0391196
INTERPRO	IPR019956:Ubiquitin subgroup	3	1.22449	6.02988e-05	ISG15, UBC, UBD	19	11	16659	239.124	0.00403199	0.00201803	0.0618271
GOTERM_BP_FAT	GO:0044265~cellular macromolecule catabolic process	7	2.85714	0.000344966	SUMO1, ISG15, MAP3K1, UBC, UBD, STUB1, MYC	20	725	13528	6.53076	0.243294	0.0138423	0.528904
GOTERM_BP_FAT	GO:0009057~macromolecule catabolic process	7	2.85714	0.000514689	SUMO1, ISG15, MAP3K1, UBC, UBD, STUB1, MYC	20	781	13528	6.06248	0.340304	0.017183	0.788163
GOTERM_BP_FAT	GO:0032446~protein modification by small protein conjugation	4	1.63265	0.000784842	SUMO1, MAP3K1, UBC, STUB1	20	132	13528	20.497	0.469747	0.0216384	1.19953
GOTERM_BP_FAT	GO:0043632~modification-dependent macromolecule catabolic process	6	2.44898	0.000957323	SUMO1, ISG15, MAP3K1, UBC, UBD, STUB1	20	574	13528	7.07038	0.538783	0.0238939	1.46134
GOTERM_BP_FAT	GO:0019941~modification-dependent protein catabolic process	6	2.44898	0.000957323	SUMO1, ISG15, MAP3K1, UBC, UBD, STUB1	20	574	13528	7.07038	0.538783	0.0238939	1.46134
GOTERM_BP_FAT	GO:0051603~proteolysis involved in cellular protein catabolic process	6	2.44898	0.0011685	SUMO1, ISG15, MAP3K1, UBC, UBD, STUB1	20	600	13528	6.764	0.611203	0.0252092	1.78099
GOTERM_BP_FAT	GO:0044257~cellular protein catabolic process	6	2.44898	0.00119494	SUMO1, ISG15, MAP3K1, UBC, UBD, STUB1	20	603	13528	6.73035	0.619431	0.0244672	1.82095
GOTERM_BP_FAT	GO:0070647~protein modification by small protein conjugation or removal	4	1.63265	0.00136891	SUMO1, MAP3K1, UBC, STUB1	20	160	13528	16.91	0.669398	0.0260091	2.08347
GOTERM_BP_FAT	GO:0030163~protein catabolic process	6	2.44898	0.00137293	SUMO1, ISG15, MAP3K1, UBC, UBD, STUB1	20	622	13528	6.52476	0.670471	0.0254857	2.08952
INTERPRO	IPR019955:Ubiquitin supergroup	3	1.22449	0.0014161	SUMO1, ISG15, UBC	19	52	16659	50.584	0.0905782	0.0311532	1.44292
GOTERM_BP_FAT	GO:0016567~protein ubiquitination	3	1.22449	0.0118993	MAP3K1, UBC, STUB1	20	119	13528	17.0521	0.999937	0.125705	16.8057
SP_PIR_KEYWORDS	ubl conjugation pathway	4	1.63265	0.01302	SUMO1, ISG15, UBD, STUB1	20	509	19235	7.55796	0.784187	0.142157	13.9079
GOTERM_BP_FAT	GO:0006508~proteolysis	6	2.44898	0.0131506	SUMO1, ISG15, MAP3K1, UBC, UBD, STUB1	20	1054	13528	3.85047	0.999977	0.132913	18.4103
GOTERM_BP_FAT	GO:0006511~ubiquitin-dependent protein catabolic process	3	1.22449	0.0446243	MAP3K1, UBC, STUB1	20	242	13528	8.38512	1	0.301006	50.4236
Annotation Cluster 4	Enrichment Score: 2.570412655434756
Category	Term	Count	%	p Value	Genes	List Total	Pop Hits	Pop Total	Fold Enrichment	Bonferroni	Benjamini	FDR
GOTERM_BP_FAT	GO:0032868~response to insulin stimulus	4	1.63265	0.000348489	HDAC5, LYN, GRB2, SHC1	20	100	13528	27.056	0.245446	0.0133213	0.534292
BIOCARTA	h_bcrPathway:BCR Signaling Pathway	4	1.63265	0.000580872	LYN, GRB2, MAP3K1, SHC1	11	26	1437	20.0979	0.0548021	0.0277871	0.639165
BIOCARTA	h_fcer1Pathway:Fc Epsilon Receptor I Signaling in Mast Cells	4	1.63265	0.000893744	LYN, GRB2, MAP3K1, SHC1	11	30	1437	17.4182	0.0830771	0.0214496	0.981893
GOTERM_CC_FAT	GO:0005829~cytosol	8	3.26531	0.000986396	CDKN1A, LYN, GRB2, MAP3K1, BAG3, UBC, SHC1, CDK2	18	1330	12782	4.27135	0.123871	0.0639825	1.14882
GOTERM_BP_FAT	GO:0043434~response to peptide hormone stimulus	4	1.63265	0.00122622	HDAC5, LYN, GRB2, SHC1	20	154	13528	17.5688	0.628942	0.0244803	1.86821
GOTERM_BP_FAT	GO:0009725~response to hormone stimulus	5	2.04082	0.00149503	HDAC5, CDKN1A, LYN, GRB2, SHC1	20	367	13528	9.21526	0.701471	0.0265065	2.27335
GOTERM_BP_FAT	GO:0009719~response to endogenous stimulus	5	2.04082	0.00214635	HDAC5, CDKN1A, LYN, GRB2, SHC1	20	405	13528	8.35062	0.823796	0.0341264	3.24857
GOTERM_BP_FAT	GO:0032869~cellular response to insulin stimulus	3	1.22449	0.00402863	HDAC5, GRB2, SHC1	20	68	13528	29.8412	0.961677	0.056581	6.01598
UP_SEQ_FEATURE	domain:SH2	3	1.22449	0.00403812	LYN, GRB2, SHC1	20	96	19113	29.8641	0.459379	0.185363	4.72761
SP_PIR_KEYWORDS	SH2 domain	3	1.22449	0.00529298	LYN, GRB2, SHC1	20	111	19235	25.9932	0.462552	0.0746798	5.88398
INTERPRO	IPR000980:SH2 motif	3	1.22449	0.00627871	LYN, GRB2, SHC1	19	111	16659	23.697	0.344266	0.100125	6.25571
KEGG_PATHWAY	hsa04062:Chemokine signaling pathway	4	1.63265	0.0132025	LYN, GRB2, RHOA, SHC1	15	187	5085	7.25134	0.492272	0.0655349	12.0649
SMART	SM00252:SH2	3	1.22449	0.0140201	LYN, GRB2, SHC1	16	111	9079	15.3361	0.224423	0.119332	9.8844
GOTERM_BP_FAT	GO:0032870~cellular response to hormone stimulus	3	1.22449	0.0147047	HDAC5, GRB2, SHC1	20	133	13528	15.2571	0.999994	0.143969	20.3629
Annotation Cluster 5	Enrichment Score: 2.5088449119484726
Category	Term	Count	%	p Value	Genes	List Total	Pop Hits	Pop Total	Fold Enrichment	Bonferroni	Benjamini	FDR
GOTERM_BP_FAT	GO:0043066~negative regulation of apoptosis	6	2.44898	0.000102486	EGFR, CDKN1A, BAG3, UBC, RHOA, MYC	20	354	13528	11.4644	0.0794769	0.0102983	0.157407
GOTERM_BP_FAT	GO:0043069~negative regulation of programmed cell death	6	2.44898	0.000109495	EGFR, CDKN1A, BAG3, UBC, RHOA, MYC	20	359	13528	11.3047	0.0846758	0.00801109	0.168163
GOTERM_BP_FAT	GO:0060548~negative regulation of cell death	6	2.44898	0.00011094	EGFR, CDKN1A, BAG3, UBC, RHOA, MYC	20	360	13528	11.2733	0.085744	0.00744256	0.17038
GOTERM_BP_FAT	GO:0042981~regulation of apoptosis	7	2.85714	0.000600999	EGFR, CDKN1A, MAP3K1, BAG3, UBC, RHOA, MYC	20	804	13528	5.88905	0.384766	0.0192426	0.919764
GOTERM_BP_FAT	GO:0043067~regulation of programmed cell death	7	2.85714	0.000633551	EGFR, CDKN1A, MAP3K1, BAG3, UBC, RHOA, MYC	20	812	13528	5.83103	0.400747	0.0195024	0.969353
GOTERM_BP_FAT	GO:0010941~regulation of cell death	7	2.85714	0.000646108	EGFR, CDKN1A, MAP3K1, BAG3, UBC, RHOA, MYC	20	815	13528	5.80957	0.4068	0.0191558	0.988478
GOTERM_BP_FAT	GO:0022402~cell cycle process	5	2.04082	0.0070726	EGFR, CDKN1A, UBC, MYC, CDK2	20	565	13528	5.98584	0.996769	0.0883502	10.3353
GOTERM_BP_FAT	GO:0007049~cell cycle	5	2.04082	0.0208757	EGFR, CDKN1A, UBC, MYC, CDK2	20	776	13528	4.35825	1	0.183664	27.6936
GOTERM_BP_FAT	GO:0043065~positive regulation of apoptosis	4	1.63265	0.021164	CDKN1A, MAP3K1, UBC, MYC	20	430	13528	6.29209	1	0.184001	28.0202
GOTERM_BP_FAT	GO:0043068~positive regulation of programmed cell death	4	1.63265	0.0215538	CDKN1A, MAP3K1, UBC, MYC	20	433	13528	6.2485	1	0.185124	28.4595
GOTERM_BP_FAT	GO:0010942~positive regulation of cell death	4	1.63265	0.0218158	CDKN1A, MAP3K1, UBC, MYC	20	435	13528	6.21977	1	0.185234	28.7534
GOTERM_BP_FAT	GO:0006917~induction of apoptosis	3	1.22449	0.073235	CDKN1A, UBC, MYC	20	320	13528	6.34125	1	0.405946	68.9315
GOTERM_BP_FAT	GO:0012502~induction of programmed cell death	3	1.22449	0.0736335	CDKN1A, UBC, MYC	20	321	13528	6.3215	1	0.40508	69.1362
Annotation Cluster 6	Enrichment Score: 2.4531737271488665
Category	Term	Count	%	p Value	Genes	List Total	Pop Hits	Pop Total	Fold Enrichment	Bonferroni	Benjamini	FDR
KEGG_PATHWAY	hsa04012:ErbB signaling pathway	5	2.04082	7.02217e-05	EGFR, CDKN1A, GRB2, SHC1, MYC	15	87	5085	19.4828	0.00357503	0.00357503	0.0679116
GOTERM_BP_FAT	GO:0000165~MAPKKK cascade	5	2.04082	0.000109425	EGFR, MDFI, GRB2, MAP3K1, SHC1	20	184	13528	18.3804	0.0846241	0.00880307	0.168056
BIOCARTA	h_tffPathway:Trefoil Factors Initiate Mucosal Healing	4	1.63265	0.000349172	EGFR, GRB2, RHOA, SHC1	11	22	1437	23.7521	0.0333083	0.0333083	0.38466
GOTERM_BP_FAT	GO:0007265~Ras protein signal transduction	4	1.63265	0.000402217	APOA1, GRB2, RHOA, SHC1	20	105	13528	25.7676	0.277513	0.0140335	0.616428
BIOCARTA	h_bcrPathway:BCR Signaling Pathway	4	1.63265	0.000580872	LYN, GRB2, MAP3K1, SHC1	11	26	1437	20.0979	0.0548021	0.0277871	0.639165
BIOCARTA	h_egfPathway:EGF Signaling Pathway	4	1.63265	0.000580872	EGFR, GRB2, MAP3K1, SHC1	11	26	1437	20.0979	0.0548021	0.0277871	0.639165
KEGG_PATHWAY	hsa05214:Glioma	4	1.63265	0.000598621	EGFR, CDKN1A, GRB2, SHC1	15	63	5085	21.5238	0.0300772	0.010128	0.577602
BIOCARTA	h_At1rPathway:Angiotensin II mediated activation of JNK Pathway via Pyk2 dependent signaling	4	1.63265	0.000651071	EGFR, GRB2, MAP3K1, SHC1	11	27	1437	19.3535	0.0612203	0.020838	0.716157
GOTERM_BP_FAT	GO:0007173~epidermal growth factor receptor signaling pathway	3	1.22449	0.000691232	EGFR, GRB2, SHC1	20	28	13528	72.4714	0.428053	0.0197561	1.05717
BIOCARTA	h_fcer1Pathway:Fc Epsilon Receptor I Signaling in Mast Cells	4	1.63265	0.000893744	LYN, GRB2, MAP3K1, SHC1	11	30	1437	17.4182	0.0830771	0.0214496	0.981893
GOTERM_BP_FAT	GO:0007242~intracellular signaling cascade	8	3.26531	0.00108223	EGFR, MDFI, APOA1, LYN, GRB2, MAP3K1, RHOA, SHC1	20	1256	13528	4.30828	0.583102	0.0246877	1.65052
GOTERM_BP_FAT	GO:0007167~enzyme linked receptor protein signaling pathway	5	2.04082	0.00115155	EGFR, GRB2, MAP3K1, SHC1, STUB1	20	342	13528	9.88889	0.605835	0.0255292	1.75537
GOTERM_BP_FAT	GO:0007243~protein kinase cascade	5	2.04082	0.00154058	EGFR, MDFI, GRB2, MAP3K1, SHC1	20	370	13528	9.14054	0.712274	0.0261571	2.34185
KEGG_PATHWAY	hsa04510:Focal adhesion	5	2.04082	0.00173555	EGFR, GRB2, RHOA, SHC1, FN1	15	201	5085	8.43284	0.084779	0.0146565	1.66638
KEGG_PATHWAY	hsa04722:Neurotrophin signaling pathway	4	1.63265	0.00423213	GRB2, MAP3K1, RHOA, SHC1	15	124	5085	10.9355	0.194504	0.030427	4.01981
BIOCARTA	h_spryPathway:Sprouty regulation of tyrosine kinase signals	3	1.22449	0.00436306	EGFR, GRB2, SHC1	11	15	1437	26.1273	0.34567	0.0813303	4.71089
GOTERM_BP_FAT	GO:0007264~small GTPase mediated signal transduction	4	1.63265	0.0084131	APOA1, GRB2, RHOA, SHC1	20	305	13528	8.87082	0.998915	0.0996968	12.1779
BIOCARTA	h_her2Pathway:Role of ERBB2 in Signal Transduction and Oncology	3	1.22449	0.00853319	EGFR, GRB2, SHC1	11	21	1437	18.6623	0.564505	0.129376	9.02391
KEGG_PATHWAY	hsa05213:Endometrial cancer	3	1.22449	0.00862897	EGFR, GRB2, MYC	15	52	5085	19.5577	0.357242	0.0479233	8.04203
BIOCARTA	h_pdgfPathway:PDGF Signaling Pathway	3	1.22449	0.0120099	GRB2, MAP3K1, SHC1	11	25	1437	15.6764	0.690257	0.136275	12.4832
BIOCARTA	h_pyk2Pathway:Links between Pyk2 and Map Kinases	3	1.22449	0.0129623	GRB2, MAP3K1, SHC1	11	26	1437	15.0734	0.71792	0.131179	13.4097
KEGG_PATHWAY	hsa04062:Chemokine signaling pathway	4	1.63265	0.0132025	LYN, GRB2, RHOA, SHC1	15	187	5085	7.25134	0.492272	0.0655349	12.0649
BIOCARTA	h_erkPathway:Erk1/Erk2 Mapk Signaling pathway	3	1.22449	0.0160128	EGFR, GRB2, SHC1	11	29	1437	13.5141	0.791082	0.144938	16.3177
BIOCARTA	h_p38mapkPathway:p38 MAPK Signaling Pathway	3	1.22449	0.0205163	GRB2, MAP3K1, SHC1	11	33	1437	11.876	0.866116	0.167064	20.4485
KEGG_PATHWAY	hsa05210:Colorectal cancer	3	1.22449	0.021574	EGFR, GRB2, MYC	15	84	5085	12.1071	0.671204	0.0885269	19.0218
BIOCARTA	h_integrinPathway:Integrin Signaling Pathway	3	1.22449	0.0217175	GRB2, RHOA, SHC1	11	34	1437	11.5267	0.88114	0.162626	21.5185
BIOCARTA	h_tcrPathway:T Cell Receptor Signaling Pathway	3	1.22449	0.0217175	GRB2, MAP3K1, SHC1	11	34	1437	11.5267	0.88114	0.162626	21.5185
KEGG_PATHWAY	hsa04912:GnRH signaling pathway	3	1.22449	0.0287768	EGFR, GRB2, MAP3K1	15	98	5085	10.3776	0.774435	0.108233	24.6081
KEGG_PATHWAY	hsa04010:MAPK signaling pathway	4	1.63265	0.03387	EGFR, GRB2, MAP3K1, MYC	15	267	5085	5.07865	0.82749	0.117963	28.347
GOTERM_BP_FAT	GO:0007169~transmembrane receptor protein tyrosine kinase signaling pathway	3	1.22449	0.0387939	EGFR, GRB2, SHC1	20	224	13528	9.05893	1	0.273631	45.5637
BIOCARTA	h_mapkPathway:MAPKinase Signaling Pathway	3	1.22449	0.103047	GRB2, MAP3K1, SHC1	11	80	1437	4.89886	0.999974	0.555789	69.885
Annotation Cluster 7	Enrichment Score: 2.4484737430168932
Category	Term	Count	%	p Value	Genes	List Total	Pop Hits	Pop Total	Fold Enrichment	Bonferroni	Benjamini	FDR
GOTERM_BP_FAT	GO:0043066~negative regulation of apoptosis	6	2.44898	0.000102486	EGFR, CDKN1A, BAG3, UBC, RHOA, MYC	20	354	13528	11.4644	0.0794769	0.0102983	0.157407
GOTERM_BP_FAT	GO:0043069~negative regulation of programmed cell death	6	2.44898	0.000109495	EGFR, CDKN1A, BAG3, UBC, RHOA, MYC	20	359	13528	11.3047	0.0846758	0.00801109	0.168163
GOTERM_BP_FAT	GO:0060548~negative regulation of cell death	6	2.44898	0.00011094	EGFR, CDKN1A, BAG3, UBC, RHOA, MYC	20	360	13528	11.2733	0.085744	0.00744256	0.17038
KEGG_PATHWAY	hsa05200:Pathways in cancer	7	2.85714	0.000132731	EGFR, CDKN1A, GRB2, RHOA, MYC, CDK2, FN1	15	328	5085	7.23476	0.00674687	0.00337915	0.12833
GOTERM_BP_FAT	GO:0008284~positive regulation of cell proliferation	6	2.44898	0.000213615	EGFR, CDKN1A, LYN, SHC1, MYC, CDK2	20	414	13528	9.8029	0.158542	0.011442	0.327824
KEGG_PATHWAY	hsa05215:Prostate cancer	4	1.63265	0.00164087	EGFR, CDKN1A, GRB2, CDK2	15	89	5085	15.236	0.0803418	0.0166111	1.57612
GOTERM_BP_FAT	GO:0042127~regulation of cell proliferation	6	2.44898	0.00386011	EGFR, CDKN1A, LYN, SHC1, MYC, CDK2	20	787	13528	5.1568	0.956063	0.0562278	5.77127
SP_PIR_KEYWORDS	kinase	5	2.04082	0.00409523	EGFR, CDKN1A, LYN, MAP3K1, CDK2	20	688	19235	6.98946	0.381294	0.06629	4.58086
KEGG_PATHWAY	hsa05219:Bladder cancer	3	1.22449	0.00569171	EGFR, CDKN1A, MYC	15	42	5085	24.2143	0.252564	0.0357342	5.37219
GOTERM_BP_FAT	GO:0022402~cell cycle process	5	2.04082	0.0070726	EGFR, CDKN1A, UBC, MYC, CDK2	20	565	13528	5.98584	0.996769	0.0883502	10.3353
GOTERM_BP_FAT	GO:0051329~interphase of mitotic cell cycle	3	1.22449	0.00902242	EGFR, CDKN1A, CDK2	20	103	13528	19.701	0.99934	0.105023	13.0037
GOTERM_BP_FAT	GO:0051325~interphase	3	1.22449	0.00953442	EGFR, CDKN1A, CDK2	20	106	13528	19.1434	0.999565	0.107595	13.692
GOTERM_BP_FAT	GO:0051726~regulation of cell cycle	4	1.63265	0.0105164	EGFR, CDKN1A, MYC, CDK2	20	331	13528	8.17402	0.999805	0.11488	14.9979
GOTERM_BP_FAT	GO:0000278~mitotic cell cycle	4	1.63265	0.0142034	EGFR, CDKN1A, UBC, CDK2	20	370	13528	7.31243	0.99999	0.141086	19.7379
GOTERM_BP_FAT	GO:0007346~regulation of mitotic cell cycle	3	1.22449	0.0189227	EGFR, MYC, CDK2	20	152	13528	13.35	1	0.171588	25.4449
GOTERM_BP_FAT	GO:0007049~cell cycle	5	2.04082	0.0208757	EGFR, CDKN1A, UBC, MYC, CDK2	20	776	13528	4.35825	1	0.183664	27.6936
GOTERM_BP_FAT	GO:0009314~response to radiation	3	1.22449	0.0315306	EGFR, CDKN1A, MYC	20	200	13528	10.146	1	0.240727	38.8863
KEGG_PATHWAY	hsa04110:Cell cycle	3	1.22449	0.0449805	CDKN1A, MYC, CDK2	15	125	5085	8.136	0.904363	0.144851	35.9323
GOTERM_BP_FAT	GO:0022403~cell cycle phase	3	1.22449	0.113557	EGFR, CDKN1A, CDK2	20	414	13528	4.90145	1	0.532755	84.3186
Annotation Cluster 8	Enrichment Score: 2.2292189378754044
Category	Term	Count	%	p Value	Genes	List Total	Pop Hits	Pop Total	Fold Enrichment	Bonferroni	Benjamini	FDR
GOTERM_CC_FAT	GO:0031974~membrane-enclosed lumen	10	4.08163	0.000226318	HDAC5, SUMO1, CDKN1A, APOA1, LYN, UBC, MSN, MYC, CDK2, FN1	18	1856	12782	3.82603	0.0298746	0.0298746	0.264659
GOTERM_CC_FAT	GO:0043233~organelle lumen	9	3.67347	0.00121664	HDAC5, SUMO1, CDKN1A, APOA1, UBC, MSN, MYC, CDK2, FN1	18	1820	12782	3.51154	0.150519	0.0529245	1.41524
GOTERM_CC_FAT	GO:0005654~nucleoplasm	6	2.44898	0.00475741	HDAC5, SUMO1, CDKN1A, UBC, MYC, CDK2	18	882	12782	4.83069	0.472187	0.147646	5.4304
GOTERM_CC_FAT	GO:0070013~intracellular organelle lumen	8	3.26531	0.00541591	HDAC5, SUMO1, CDKN1A, APOA1, UBC, MSN, MYC, CDK2	18	1779	12782	3.1933	0.516983	0.135445	6.16042
GOTERM_CC_FAT	GO:0031981~nuclear lumen	7	2.85714	0.0086361	HDAC5, SUMO1, CDKN1A, UBC, MSN, MYC, CDK2	18	1450	12782	3.42812	0.687222	0.176104	9.65669
GOTERM_BP_FAT	GO:0010605~negative regulation of macromolecule metabolic process	5	2.04082	0.0173467	MDFI, HDAC5, SUMO1, UBC, MYC	20	734	13528	4.60763	0.999999	0.160171	23.5827
SP_PIR_KEYWORDS	nucleus	7	2.85714	0.233889	MDFI, HDAC5, SUMO1, CDKN1A, LYN, UBC, MYC	20	4283	19235	1.57185	1	0.806143	95.2374
Annotation Cluster 9	Enrichment Score: 2.1536834102867735
Category	Term	Count	%	p Value	Genes	List Total	Pop Hits	Pop Total	Fold Enrichment	Bonferroni	Benjamini	FDR
GOTERM_BP_FAT	GO:0044093~positive regulation of molecular function	8	3.26531	8.82338e-06	EGFR, MDFI, HDAC5, APOA1, MAP3K1, UBC, SHC1, MYC	20	586	13528	9.23413	0.00710397	0.00355832	0.0135608
GOTERM_BP_FAT	GO:0010604~positive regulation of macromolecule metabolic process	8	3.26531	0.000102611	HDAC5, LYN, MAP3K1, UBC, SHC1, STUB1, MYC, CDK2	20	857	13528	6.31412	0.0795694	0.00917032	0.157597
GOTERM_BP_FAT	GO:0051173~positive regulation of nitrogen compound metabolic process	7	2.85714	0.000181075	EGFR, HDAC5, MAP3K1, UBC, SHC1, MYC, CDK2	20	644	13528	7.35217	0.13612	0.0103971	0.277952
GOTERM_BP_FAT	GO:0031328~positive regulation of cellular biosynthetic process	7	2.85714	0.000253605	EGFR, HDAC5, MAP3K1, UBC, SHC1, MYC, CDK2	20	685	13528	6.91212	0.185303	0.012727	0.389085
GOTERM_BP_FAT	GO:0009891~positive regulation of biosynthetic process	7	2.85714	0.000274388	EGFR, HDAC5, MAP3K1, UBC, SHC1, MYC, CDK2	20	695	13528	6.81266	0.198873	0.0129586	0.420907
GOTERM_BP_FAT	GO:0045935~positive regulation of nucleobase, nucleoside, nucleotide and nucleic acid metabolic process	6	2.44898	0.00139276	HDAC5, MAP3K1, UBC, SHC1, MYC, CDK2	20	624	13528	6.50385	0.675715	0.0252692	2.11939
GOTERM_BP_FAT	GO:0010557~positive regulation of macromolecule biosynthetic process	6	2.44898	0.00171654	HDAC5, MAP3K1, UBC, SHC1, MYC, CDK2	20	654	13528	6.2055	0.750464	0.0285057	2.60604
GOTERM_CC_FAT	GO:0005654~nucleoplasm	6	2.44898	0.00475741	HDAC5, SUMO1, CDKN1A, UBC, MYC, CDK2	18	882	12782	4.83069	0.472187	0.147646	5.4304
GOTERM_BP_FAT	GO:0045941~positive regulation of transcription	5	2.04082	0.00702883	HDAC5, MAP3K1, UBC, MYC, CDK2	20	564	13528	5.99645	0.996652	0.0892001	10.2745
GOTERM_BP_FAT	GO:0010628~positive regulation of gene expression	5	2.04082	0.00779785	HDAC5, MAP3K1, UBC, MYC, CDK2	20	581	13528	5.821	0.99821	0.0941066	11.3366
SP_PIR_KEYWORDS	acetylation	8	3.26531	0.0100289	HDAC5, CDKN1A, GRB2, MAP3K1, UBC, MSN, MYC, CDK2	20	2635	19235	2.91992	0.692507	0.122812	10.879
GOTERM_BP_FAT	GO:0006357~regulation of transcription from RNA polymerase II promoter	5	2.04082	0.0167987	MDFI, HDAC5, MAP3K1, RHOA, MYC	20	727	13528	4.65199	0.999999	0.159093	22.9249
UP_SEQ_FEATURE	compositionally biased region:Poly-Gly	3	1.22449	0.0322692	HDAC5, MAP3K1, MYC	20	286	19113	10.0243	0.993166	0.509464	32.4701
GOTERM_BP_FAT	GO:0033043~regulation of organelle organization	3	1.22449	0.0366136	MAP3K1, RHOA, MYC	20	217	13528	9.35115	1	0.262459	43.6346
GOTERM_BP_FAT	GO:0045944~positive regulation of transcription from RNA polymerase II promoter	3	1.22449	0.0944376	HDAC5, MAP3K1, MYC	20	371	13528	5.46954	1	0.470665	78.2314
GOTERM_BP_FAT	GO:0045893~positive regulation of transcription, DNA-dependent	3	1.22449	0.143234	HDAC5, MAP3K1, MYC	20	477	13528	4.25409	1	0.614612	90.7085
GOTERM_BP_FAT	GO:0051254~positive regulation of RNA metabolic process	3	1.22449	0.145175	HDAC5, MAP3K1, MYC	20	481	13528	4.21871	1	0.61717	91.0269
GOTERM_BP_FAT	GO:0006355~regulation of transcription, DNA-dependent	5	2.04082	0.231893	MDFI, HDAC5, MAP3K1, RHOA, MYC	20	1773	13528	1.9075	1	0.779499	98.2665
GOTERM_BP_FAT	GO:0051252~regulation of RNA metabolic process	5	2.04082	0.244548	MDFI, HDAC5, MAP3K1, RHOA, MYC	20	1813	13528	1.86542	1	0.797241	98.6571
GOTERM_MF_FAT	GO:0030528~transcription regulator activity	3	1.22449	0.535394	HDAC5, UBC, MYC	16	1512	12983	1.61	1	0.997624	99.9873
Annotation Cluster 10	Enrichment Score: 2.062806431601628
Category	Term	Count	%	p Value	Genes	List Total	Pop Hits	Pop Total	Fold Enrichment	Bonferroni	Benjamini	FDR
GOTERM_BP_FAT	GO:0032880~regulation of protein localization	4	1.63265	0.000892934	MDFI, SUMO1, APOA1, RHOA	20	138	13528	19.6058	0.514129	0.0237733	1.36368
GOTERM_BP_FAT	GO:0051223~regulation of protein transport	3	1.22449	0.0109619	MDFI, APOA1, RHOA	20	114	13528	17.8	0.999864	0.11789	15.5842
GOTERM_BP_FAT	GO:0070201~regulation of establishment of protein localization	3	1.22449	0.0122839	MDFI, APOA1, RHOA	20	121	13528	16.7702	0.999954	0.127861	17.3019
GOTERM_BP_FAT	GO:0060341~regulation of cellular localization	3	1.22449	0.0466371	MDFI, APOA1, RHOA	20	248	13528	8.18226	1	0.307552	52.0049
Annotation Cluster 11	Enrichment Score: 2.0413426887371986
Category	Term	Count	%	p Value	Genes	List Total	Pop Hits	Pop Total	Fold Enrichment	Bonferroni	Benjamini	FDR
GOTERM_BP_FAT	GO:0010033~response to organic substance	7	2.85714	0.000334804	EGFR, HDAC5, CDKN1A, LYN, GRB2, SHC1, MYC	20	721	13528	6.56699	0.237053	0.0141394	0.513361
GOTERM_BP_FAT	GO:0032868~response to insulin stimulus	4	1.63265	0.000348489	HDAC5, LYN, GRB2, SHC1	20	100	13528	27.056	0.245446	0.0133213	0.534292
GOTERM_BP_FAT	GO:0043434~response to peptide hormone stimulus	4	1.63265	0.00122622	HDAC5, LYN, GRB2, SHC1	20	154	13528	17.5688	0.628942	0.0244803	1.86821
SP_PIR_KEYWORDS	alternative splicing	8	3.26531	0.657466	EGFR, HDAC5, LYN, GRB2, SHC1, STUB1, MYC, FN1	20	7488	19235	1.02751	1	0.993356	99.9995
UP_SEQ_FEATURE	splice variant	8	3.26531	0.660486	EGFR, HDAC5, LYN, GRB2, SHC1, STUB1, MYC, FN1	20	7458	19113	1.0251	1	1	99.9998
Annotation Cluster 12	Enrichment Score: 2.0251587955732813
Category	Term	Count	%	p Value	Genes	List Total	Pop Hits	Pop Total	Fold Enrichment	Bonferroni	Benjamini	FDR
GOTERM_BP_FAT	GO:0060284~regulation of cell development	4	1.63265	0.00277806	HDAC5, LYN, UBC, RHOA	20	205	13528	13.198	0.894368	0.0423058	4.18572
GOTERM_BP_FAT	GO:0010647~positive regulation of cell communication	4	1.63265	0.0103447	EGFR, LYN, UBC, RHOA	20	329	13528	8.22371	0.999776	0.114647	14.7708
GOTERM_BP_FAT	GO:0051960~regulation of nervous system development	3	1.22449	0.029246	LYN, UBC, RHOA	20	192	13528	10.5687	1	0.227315	36.6324
Annotation Cluster 13	Enrichment Score: 1.935242701600935
Category	Term	Count	%	p Value	Genes	List Total	Pop Hits	Pop Total	Fold Enrichment	Bonferroni	Benjamini	FDR
GOTERM_BP_FAT	GO:0042981~regulation of apoptosis	7	2.85714	0.000600999	EGFR, CDKN1A, MAP3K1, BAG3, UBC, RHOA, MYC	20	804	13528	5.88905	0.384766	0.0192426	0.919764
GOTERM_BP_FAT	GO:0043067~regulation of programmed cell death	7	2.85714	0.000633551	EGFR, CDKN1A, MAP3K1, BAG3, UBC, RHOA, MYC	20	812	13528	5.83103	0.400747	0.0195024	0.969353
GOTERM_BP_FAT	GO:0010941~regulation of cell death	7	2.85714	0.000646108	EGFR, CDKN1A, MAP3K1, BAG3, UBC, RHOA, MYC	20	815	13528	5.80957	0.4068	0.0191558	0.988478
GOTERM_BP_FAT	GO:0045941~positive regulation of transcription	5	2.04082	0.00702883	HDAC5, MAP3K1, UBC, MYC, CDK2	20	564	13528	5.99645	0.996652	0.0892001	10.2745
GOTERM_BP_FAT	GO:0010628~positive regulation of gene expression	5	2.04082	0.00779785	HDAC5, MAP3K1, UBC, MYC, CDK2	20	581	13528	5.821	0.99821	0.0941066	11.3366
GOTERM_BP_FAT	GO:0043065~positive regulation of apoptosis	4	1.63265	0.021164	CDKN1A, MAP3K1, UBC, MYC	20	430	13528	6.29209	1	0.184001	28.0202
GOTERM_BP_FAT	GO:0043068~positive regulation of programmed cell death	4	1.63265	0.0215538	CDKN1A, MAP3K1, UBC, MYC	20	433	13528	6.2485	1	0.185124	28.4595
GOTERM_BP_FAT	GO:0010942~positive regulation of cell death	4	1.63265	0.0218158	CDKN1A, MAP3K1, UBC, MYC	20	435	13528	6.21977	1	0.185234	28.7534
GOTERM_BP_FAT	GO:0006916~anti-apoptosis	3	1.22449	0.0332897	BAG3, UBC, MYC	20	206	13528	9.85049	1	0.247954	40.5703
GOTERM_BP_FAT	GO:0006915~apoptosis	4	1.63265	0.0499752	MAP3K1, BAG3, UBC, MYC	20	602	13528	4.49435	1	0.321003	54.5238
GOTERM_BP_FAT	GO:0012501~programmed cell death	4	1.63265	0.0518402	MAP3K1, BAG3, UBC, MYC	20	611	13528	4.42815	1	0.32851	55.8768
GOTERM_BP_FAT	GO:0008219~cell death	4	1.63265	0.076849	MAP3K1, BAG3, UBC, MYC	20	719	13528	3.763	1	0.411152	70.7424
GOTERM_BP_FAT	GO:0016265~death	4	1.63265	0.0781204	MAP3K1, BAG3, UBC, MYC	20	724	13528	3.73702	1	0.413941	71.3557
Annotation Cluster 14	Enrichment Score: 1.933778344997221
Category	Term	Count	%	p Value	Genes	List Total	Pop Hits	Pop Total	Fold Enrichment	Bonferroni	Benjamini	FDR
GOTERM_BP_FAT	GO:0051270~regulation of cell motion	4	1.63265	0.00234087	EGFR, HDAC5, LYN, MAP3K1	20	193	13528	14.0187	0.849477	0.0364493	3.53805
GOTERM_BP_FAT	GO:0030334~regulation of cell migration	3	1.22449	0.0230793	EGFR, HDAC5, MAP3K1	20	169	13528	12.0071	1	0.192969	30.1547
GOTERM_BP_FAT	GO:0040012~regulation of locomotion	3	1.22449	0.029246	EGFR, HDAC5, MAP3K1	20	192	13528	10.5687	1	0.227315	36.6324
Annotation Cluster 15	Enrichment Score: 1.8949983093335967
Category	Term	Count	%	p Value	Genes	List Total	Pop Hits	Pop Total	Fold Enrichment	Bonferroni	Benjamini	FDR
GOTERM_BP_FAT	GO:0009628~response to abiotic stimulus	5	2.04082	0.00151011	EGFR, CDKN1A, LYN, MAP3K1, MYC	20	368	13528	9.19022	0.705091	0.0261961	2.29603
KEGG_PATHWAY	hsa04010:MAPK signaling pathway	4	1.63265	0.03387	EGFR, GRB2, MAP3K1, MYC	15	267	5085	5.07865	0.82749	0.117963	28.347
GOTERM_BP_FAT	GO:0007423~sensory organ development	3	1.22449	0.0403815	EGFR, MAP3K1, MYC	20	229	13528	8.86114	1	0.280901	46.9294
Annotation Cluster 16	Enrichment Score: 1.7759724684787848
Category	Term	Count	%	p Value	Genes	List Total	Pop Hits	Pop Total	Fold Enrichment	Bonferroni	Benjamini	FDR
GOTERM_BP_FAT	GO:0042325~regulation of phosphorylation	7	2.85714	2.9947e-05	EGFR, MDFI, CDKN1A, APOA1, LYN, MAP3K1, SHC1	20	466	13528	10.1605	0.0239072	0.00803342	0.046019
GOTERM_BP_FAT	GO:0051174~regulation of phosphorus metabolic process	7	2.85714	3.75048e-05	EGFR, MDFI, CDKN1A, APOA1, LYN, MAP3K1, SHC1	20	485	13528	9.76247	0.0298499	0.00604256	0.0576297
GOTERM_BP_FAT	GO:0019220~regulation of phosphate metabolic process	7	2.85714	3.75048e-05	EGFR, MDFI, CDKN1A, APOA1, LYN, MAP3K1, SHC1	20	485	13528	9.76247	0.0298499	0.00604256	0.0576297
GOTERM_BP_FAT	GO:0001932~regulation of protein amino acid phosphorylation	5	2.04082	8.6174e-05	EGFR, MDFI, APOA1, LYN, MAP3K1	20	173	13528	19.5491	0.0672627	0.00989806	0.132368
SP_PIR_KEYWORDS	Proto-oncogene	4	1.63265	0.00141934	EGFR, LYN, RHOA, MYC	20	230	19235	16.7261	0.153107	0.0406941	1.60989
GOTERM_BP_FAT	GO:0009628~response to abiotic stimulus	5	2.04082	0.00151011	EGFR, CDKN1A, LYN, MAP3K1, MYC	20	368	13528	9.19022	0.705091	0.0261961	2.29603
GOTERM_BP_FAT	GO:0006468~protein amino acid phosphorylation	6	2.44898	0.00187298	EGFR, MDFI, LYN, MAP3K1, SHC1, CDK2	20	667	13528	6.08456	0.780144	0.030441	2.84037
GOTERM_BP_FAT	GO:0051270~regulation of cell motion	4	1.63265	0.00234087	EGFR, HDAC5, LYN, MAP3K1	20	193	13528	14.0187	0.849477	0.0364493	3.53805
GOTERM_MF_FAT	GO:0019899~enzyme binding	5	2.04082	0.00249221	EGFR, APOA1, LYN, MAP3K1, STUB1	16	523	12983	7.75753	0.284213	0.284213	2.87933
SP_PIR_KEYWORDS	kinase	5	2.04082	0.00409523	EGFR, CDKN1A, LYN, MAP3K1, CDK2	20	688	19235	6.98946	0.381294	0.06629	4.58086
GOTERM_BP_FAT	GO:0016310~phosphorylation	6	2.44898	0.00414241	EGFR, MDFI, LYN, MAP3K1, SHC1, CDK2	20	800	13528	5.073	0.965056	0.0571446	6.18088
GOTERM_BP_FAT	GO:0070302~regulation of stress-activated protein kinase signaling pathway	3	1.22449	0.00414542	MDFI, LYN, MAP3K1	20	69	13528	29.4087	0.965142	0.0562274	6.18524
GOTERM_MF_FAT	GO:0042802~identical protein binding	5	2.04082	0.00516497	EGFR, APOA1, MAP3K1, STUB1, CDK2	16	640	12983	6.33936	0.500376	0.293159	5.88283
GOTERM_BP_FAT	GO:0080135~regulation of cellular response to stress	3	1.22449	0.00902242	MDFI, LYN, MAP3K1	20	103	13528	19.701	0.99934	0.105023	13.0037
GOTERM_BP_FAT	GO:0006796~phosphate metabolic process	6	2.44898	0.00947152	EGFR, MDFI, LYN, MAP3K1, SHC1, CDK2	20	973	13528	4.17102	0.999542	0.108427	13.6077
GOTERM_BP_FAT	GO:0006793~phosphorus metabolic process	6	2.44898	0.00947152	EGFR, MDFI, LYN, MAP3K1, SHC1, CDK2	20	973	13528	4.17102	0.999542	0.108427	13.6077
GOTERM_BP_FAT	GO:0010647~positive regulation of cell communication	4	1.63265	0.0103447	EGFR, LYN, UBC, RHOA	20	329	13528	8.22371	0.999776	0.114647	14.7708
UP_SEQ_FEATURE	domain:Protein kinase	4	1.63265	0.0106187	EGFR, LYN, MAP3K1, CDK2	20	469	19113	8.15053	0.802629	0.333468	11.9948
INTERPRO	IPR017441:Protein kinase, ATP binding site	4	1.63265	0.012171	EGFR, LYN, MAP3K1, CDK2	19	455	16659	7.70804	0.55977	0.151336	11.8028
INTERPRO	IPR000719:Protein kinase, core	4	1.63265	0.0137429	EGFR, LYN, MAP3K1, CDK2	19	476	16659	7.36798	0.604323	0.143179	13.2317
UP_SEQ_FEATURE	binding site:ATP	4	1.63265	0.0156689	EGFR, LYN, MAP3K1, CDK2	20	542	19113	7.05277	0.909331	0.381283	17.2236
SP_PIR_KEYWORDS	phosphotransferase	3	1.22449	0.016531	EGFR, LYN, CDK2	20	201	19235	14.3545	0.857768	0.162471	17.3432
SP_PIR_KEYWORDS	ATP	3	1.22449	0.0223442	EGFR, LYN, CDK2	20	236	19235	12.2256	0.928918	0.184031	22.7572
UP_SEQ_FEATURE	active site:Proton acceptor	4	1.63265	0.0260955	EGFR, LYN, MAP3K1, CDK2	20	658	19113	5.80942	0.982033	0.488223	27.1295
GOTERM_MF_FAT	GO:0004672~protein kinase activity	4	1.63265	0.030264	EGFR, LYN, MAP3K1, CDK2	16	606	12983	5.35602	0.983723	0.561152	30.2193
UP_SEQ_FEATURE	nucleotide phosphate-binding region:ATP	4	1.63265	0.0675208	EGFR, LYN, MAP3K1, CDK2	20	962	19113	3.9736	0.999976	0.735062	56.6878
SP_PIR_KEYWORDS	nucleotide-binding	5	2.04082	0.0788565	EGFR, LYN, MAP3K1, RHOA, CDK2	20	1686	19235	2.85216	0.999933	0.496641	60.8818
GOTERM_MF_FAT	GO:0004674~protein serine/threonine kinase activity	3	1.22449	0.0865057	EGFR, MAP3K1, CDK2	16	430	12983	5.66119	0.999995	0.867434	65.3317
GOTERM_CC_FAT	GO:0043228~non-membrane-bounded organelle	7	2.85714	0.11199	LYN, MAP3K1, UBC, RHOA, MSN, MYC, CDK2	18	2596	12782	1.91478	1	0.653902	75.108
GOTERM_CC_FAT	GO:0043232~intracellular non-membrane-bounded organelle	7	2.85714	0.11199	LYN, MAP3K1, UBC, RHOA, MSN, MYC, CDK2	18	2596	12782	1.91478	1	0.653902	75.108
SP_PIR_KEYWORDS	atp-binding	4	1.63265	0.139122	EGFR, LYN, MAP3K1, CDK2	20	1326	19235	2.90121	1	0.665605	81.945
GOTERM_MF_FAT	GO:0032553~ribonucleotide binding	5	2.04082	0.151593	EGFR, LYN, MAP3K1, RHOA, CDK2	16	1836	12983	2.2098	1	0.936303	85.4093
GOTERM_MF_FAT	GO:0032555~purine ribonucleotide binding	5	2.04082	0.151593	EGFR, LYN, MAP3K1, RHOA, CDK2	16	1836	12983	2.2098	1	0.936303	85.4093
SP_PIR_KEYWORDS	transferase	4	1.63265	0.155017	EGFR, LYN, MAP3K1, CDK2	20	1394	19235	2.75968	1	0.686281	85.4081
GOTERM_MF_FAT	GO:0017076~purine nucleotide binding	5	2.04082	0.170297	EGFR, LYN, MAP3K1, RHOA, CDK2	16	1918	12983	2.11532	1	0.918048	88.7612
GOTERM_MF_FAT	GO:0005524~ATP binding	4	1.63265	0.239209	EGFR, LYN, MAP3K1, CDK2	16	1477	12983	2.19753	1	0.964224	95.9279
GOTERM_MF_FAT	GO:0032559~adenyl ribonucleotide binding	4	1.63265	0.24562	EGFR, LYN, MAP3K1, CDK2	16	1497	12983	2.16817	1	0.957037	96.312
GOTERM_MF_FAT	GO:0000166~nucleotide binding	5	2.04082	0.253015	EGFR, LYN, MAP3K1, RHOA, CDK2	16	2245	12983	1.80721	1	0.950553	96.7138
GOTERM_MF_FAT	GO:0030554~adenyl nucleotide binding	4	1.63265	0.271616	EGFR, LYN, MAP3K1, CDK2	16	1577	12983	2.05818	1	0.95185	97.5539
GOTERM_MF_FAT	GO:0001883~purine nucleoside binding	4	1.63265	0.27951	EGFR, LYN, MAP3K1, CDK2	16	1601	12983	2.02733	1	0.946526	97.8469
GOTERM_MF_FAT	GO:0001882~nucleoside binding	4	1.63265	0.28314	EGFR, LYN, MAP3K1, CDK2	16	1612	12983	2.01349	1	0.938445	97.9705
GOTERM_BP_FAT	GO:0008104~protein localization	3	1.22449	0.354205	EGFR, MDFI, LYN	20	882	13528	2.30068	1	0.914015	99.8795
SP_PIR_KEYWORDS	cell membrane	4	1.63265	0.370986	EGFR, LYN, RHOA, MSN	20	2194	19235	1.75342	1	0.933601	99.4996
Annotation Cluster 17	Enrichment Score: 1.6047273393729478
Category	Term	Count	%	p Value	Genes	List Total	Pop Hits	Pop Total	Fold Enrichment	Bonferroni	Benjamini	FDR
GOTERM_CC_FAT	GO:0005654~nucleoplasm	6	2.44898	0.00475741	HDAC5, SUMO1, CDKN1A, UBC, MYC, CDK2	18	882	12782	4.83069	0.472187	0.147646	5.4304
GOTERM_CC_FAT	GO:0031981~nuclear lumen	7	2.85714	0.0086361	HDAC5, SUMO1, CDKN1A, UBC, MSN, MYC, CDK2	18	1450	12782	3.42812	0.687222	0.176104	9.65669
GOTERM_BP_FAT	GO:0010605~negative regulation of macromolecule metabolic process	5	2.04082	0.0173467	MDFI, HDAC5, SUMO1, UBC, MYC	20	734	13528	4.60763	0.999999	0.160171	23.5827
GOTERM_CC_FAT	GO:0016604~nuclear body	3	1.22449	0.0205192	HDAC5, SUMO1, MYC	18	168	12782	12.6806	0.937848	0.293387	21.5528
GOTERM_BP_FAT	GO:0010629~negative regulation of gene expression	4	1.63265	0.0319504	MDFI, HDAC5, SUMO1, MYC	20	504	13528	5.36825	1	0.241326	39.2922
GOTERM_CC_FAT	GO:0044451~nucleoplasm part	4	1.63265	0.0351613	HDAC5, SUMO1, MYC, CDK2	18	555	12782	5.11792	0.991741	0.380996	34.2355
GOTERM_BP_FAT	GO:0045449~regulation of transcription	8	3.26531	0.0561647	MDFI, HDAC5, SUMO1, MAP3K1, UBC, RHOA, MYC, CDK2	20	2601	13528	2.08043	1	0.348507	58.8706
GOTERM_BP_FAT	GO:0006259~DNA metabolic process	3	1.22449	0.157439	SUMO1, MYC, CDK2	20	506	13528	4.01028	1	0.64405	92.814
Annotation Cluster 18	Enrichment Score: 1.5712767687802491
Category	Term	Count	%	p Value	Genes	List Total	Pop Hits	Pop Total	Fold Enrichment	Bonferroni	Benjamini	FDR
SP_PIR_KEYWORDS	isopeptide bond	5	2.04082	0.00023632	EGFR, SUMO1, ISG15, UBC, FN1	20	319	19235	15.0745	0.0272738	0.0137312	0.269703
SP_PIR_KEYWORDS	Proto-oncogene	4	1.63265	0.00141934	EGFR, LYN, RHOA, MYC	20	230	19235	16.7261	0.153107	0.0406941	1.60989
KEGG_PATHWAY	hsa04510:Focal adhesion	5	2.04082	0.00173555	EGFR, GRB2, RHOA, SHC1, FN1	15	201	5085	8.43284	0.084779	0.0146565	1.66638
GOTERM_BP_FAT	GO:0010647~positive regulation of cell communication	4	1.63265	0.0103447	EGFR, LYN, UBC, RHOA	20	329	13528	8.22371	0.999776	0.114647	14.7708
GOTERM_BP_FAT	GO:0000902~cell morphogenesis	4	1.63265	0.0128052	EGFR, UBC, RHOA, FN1	20	356	13528	7.6	0.99997	0.131269	17.9702
GOTERM_CC_FAT	GO:0016324~apical plasma membrane	3	1.22449	0.0131942	EGFR, MSN, FN1	18	133	12782	16.0175	0.831328	0.224507	14.4022
GOTERM_BP_FAT	GO:0032989~cellular component morphogenesis	4	1.63265	0.0171399	EGFR, UBC, RHOA, FN1	20	397	13528	6.81511	0.999999	0.160218	23.335
KEGG_PATHWAY	hsa04810:Regulation of actin cytoskeleton	4	1.63265	0.0192063	EGFR, RHOA, MSN, FN1	15	215	5085	6.30698	0.62807	0.0859898	17.1061
SP_PIR_KEYWORDS	duplication	3	1.22449	0.0209496	EGFR, UBC, FN1	20	228	19235	12.6546	0.916018	0.186516	21.4887
GOTERM_CC_FAT	GO:0045177~apical part of cell	3	1.22449	0.0231044	EGFR, MSN, FN1	18	179	12782	11.9013	0.956383	0.293926	23.943
GOTERM_BP_FAT	GO:0007155~cell adhesion	4	1.63265	0.0721068	EGFR, RHOA, MSN, FN1	20	700	13528	3.86514	1	0.406246	68.3451
GOTERM_BP_FAT	GO:0022610~biological adhesion	4	1.63265	0.0723529	EGFR, RHOA, MSN, FN1	20	701	13528	3.85963	1	0.404686	68.4739
GOTERM_MF_FAT	GO:0008092~cytoskeletal protein binding	3	1.22449	0.113234	EGFR, RHOA, MSN	16	504	12983	4.82999	1	0.899788	75.5131
GOTERM_CC_FAT	GO:0044459~plasma membrane part	6	2.44898	0.155136	EGFR, LYN, RHOA, SHC1, MSN, FN1	18	2203	12782	1.93403	1	0.735207	86.107
SP_PIR_KEYWORDS	cell membrane	4	1.63265	0.370986	EGFR, LYN, RHOA, MSN	20	2194	19235	1.75342	1	0.933601	99.4996
GOTERM_CC_FAT	GO:0005886~plasma membrane	7	2.85714	0.387104	EGFR, APOA1, LYN, RHOA, SHC1, MSN, FN1	18	3777	12782	1.31607	1	0.949302	99.6759
SP_PIR_KEYWORDS	membrane	5	2.04082	0.910243	EGFR, SUMO1, LYN, RHOA, MSN	20	6256	19235	0.768662	1	0.99994	100
Annotation Cluster 19	Enrichment Score: 1.4274976544334104
Category	Term	Count	%	p Value	Genes	List Total	Pop Hits	Pop Total	Fold Enrichment	Bonferroni	Benjamini	FDR
GOTERM_BP_FAT	GO:0031401~positive regulation of protein modification process	3	1.22449	0.027854	LYN, UBC, STUB1	20	187	13528	10.8513	1	0.21972	35.2214
GOTERM_BP_FAT	GO:0032270~positive regulation of cellular protein metabolic process	3	1.22449	0.0416694	LYN, UBC, STUB1	20	233	13528	8.70901	1	0.286207	48.0137
GOTERM_BP_FAT	GO:0051247~positive regulation of protein metabolic process	3	1.22449	0.0449574	LYN, UBC, STUB1	20	243	13528	8.35062	1	0.300493	50.6886
Annotation Cluster 20	Enrichment Score: 1.2858479130457519
Category	Term	Count	%	p Value	Genes	List Total	Pop Hits	Pop Total	Fold Enrichment	Bonferroni	Benjamini	FDR
GOTERM_BP_FAT	GO:0006928~cell motion	4	1.63265	0.0274319	APOA1, UBC, MSN, FN1	20	475	13528	5.696	1	0.218839	34.7877
GOTERM_BP_FAT	GO:0016477~cell migration	3	1.22449	0.0564646	APOA1, MSN, FN1	20	276	13528	7.35217	1	0.347489	59.071
GOTERM_BP_FAT	GO:0051674~localization of cell	3	1.22449	0.0681222	APOA1, MSN, FN1	20	307	13528	6.60977	1	0.393508	66.1901
GOTERM_BP_FAT	GO:0048870~cell motility	3	1.22449	0.0681222	APOA1, MSN, FN1	20	307	13528	6.60977	1	0.393508	66.1901
Annotation Cluster 21	Enrichment Score: 1.1536395436433309
Category	Term	Count	%	p Value	Genes	List Total	Pop Hits	Pop Total	Fold Enrichment	Bonferroni	Benjamini	FDR
GOTERM_BP_FAT	GO:0051101~regulation of DNA binding	3	1.22449	0.0122839	MDFI, HDAC5, SUMO1	20	121	13528	16.7702	0.999954	0.127861	17.3019
GOTERM_BP_FAT	GO:0010605~negative regulation of macromolecule metabolic process	5	2.04082	0.0173467	MDFI, HDAC5, SUMO1, UBC, MYC	20	734	13528	4.60763	0.999999	0.160171	23.5827
GOTERM_BP_FAT	GO:0051098~regulation of binding	3	1.22449	0.0191574	MDFI, HDAC5, SUMO1	20	153	13528	13.2627	1	0.171639	25.7185
GOTERM_BP_FAT	GO:0010629~negative regulation of gene expression	4	1.63265	0.0319504	MDFI, HDAC5, SUMO1, MYC	20	504	13528	5.36825	1	0.241326	39.2922
GOTERM_BP_FAT	GO:0016481~negative regulation of transcription	3	1.22449	0.134578	MDFI, HDAC5, SUMO1	20	459	13528	4.42092	1	0.592762	89.156
GOTERM_BP_FAT	GO:0045934~negative regulation of nucleobase, nucleoside, nucleotide and nucleic acid metabolic process	3	1.22449	0.160414	MDFI, HDAC5, SUMO1	20	512	13528	3.96328	1	0.648831	93.1943
GOTERM_BP_FAT	GO:0051172~negative regulation of nitrogen compound metabolic process	3	1.22449	0.1639	MDFI, HDAC5, SUMO1	20	519	13528	3.90983	1	0.654758	93.6158
GOTERM_BP_FAT	GO:0010558~negative regulation of macromolecule biosynthetic process	3	1.22449	0.177988	MDFI, HDAC5, SUMO1	20	547	13528	3.70969	1	0.68525	95.0834
GOTERM_BP_FAT	GO:0031327~negative regulation of cellular biosynthetic process	3	1.22449	0.185113	MDFI, HDAC5, SUMO1	20	561	13528	3.61711	1	0.698373	95.6991
GOTERM_BP_FAT	GO:0009890~negative regulation of biosynthetic process	3	1.22449	0.191257	MDFI, HDAC5, SUMO1	20	573	13528	3.54136	1	0.708856	96.1714
Annotation Cluster 22	Enrichment Score: 1.1051664317312282
Category	Term	Count	%	p Value	Genes	List Total	Pop Hits	Pop Total	Fold Enrichment	Bonferroni	Benjamini	FDR
GOTERM_BP_FAT	GO:0042981~regulation of apoptosis	7	2.85714	0.000600999	EGFR, CDKN1A, MAP3K1, BAG3, UBC, RHOA, MYC	20	804	13528	5.88905	0.384766	0.0192426	0.919764
GOTERM_BP_FAT	GO:0043067~regulation of programmed cell death	7	2.85714	0.000633551	EGFR, CDKN1A, MAP3K1, BAG3, UBC, RHOA, MYC	20	812	13528	5.83103	0.400747	0.0195024	0.969353
GOTERM_BP_FAT	GO:0010941~regulation of cell death	7	2.85714	0.000646108	EGFR, CDKN1A, MAP3K1, BAG3, UBC, RHOA, MYC	20	815	13528	5.80957	0.4068	0.0191558	0.988478
GOTERM_BP_FAT	GO:0043065~positive regulation of apoptosis	4	1.63265	0.021164	CDKN1A, MAP3K1, UBC, MYC	20	430	13528	6.29209	1	0.184001	28.0202
GOTERM_BP_FAT	GO:0043068~positive regulation of programmed cell death	4	1.63265	0.0215538	CDKN1A, MAP3K1, UBC, MYC	20	433	13528	6.2485	1	0.185124	28.4595
GOTERM_BP_FAT	GO:0010942~positive regulation of cell death	4	1.63265	0.0218158	CDKN1A, MAP3K1, UBC, MYC	20	435	13528	6.21977	1	0.185234	28.7534
SP_PIR_KEYWORDS	zinc-finger	3	1.22449	0.516068	CDKN1A, MAP3K1, UBC	20	1718	19235	1.67942	1	0.975082	99.975
SP_PIR_KEYWORDS	zinc	3	1.22449	0.653699	CDKN1A, MAP3K1, UBC	20	2189	19235	1.31807	1	0.994314	99.9995
GOTERM_MF_FAT	GO:0008270~zinc ion binding	3	1.22449	0.775641	CDKN1A, MAP3K1, UBC	16	2311	12983	1.05336	1	0.999985	100
SP_PIR_KEYWORDS	metal-binding	3	1.22449	0.815818	CDKN1A, MAP3K1, UBC	20	2972	19235	0.970811	1	0.999506	100
GOTERM_MF_FAT	GO:0046914~transition metal ion binding	3	1.22449	0.863893	CDKN1A, MAP3K1, UBC	16	2785	12983	0.87408	1	0.999998	100
GOTERM_MF_FAT	GO:0046872~metal ion binding	4	1.63265	0.902354	CDKN1A, MAP3K1, UBC, RHOA	16	4140	12983	0.783998	1	1	100
GOTERM_MF_FAT	GO:0043169~cation binding	4	1.63265	0.906438	CDKN1A, MAP3K1, UBC, RHOA	16	4179	12983	0.776681	1	0.999999	100
GOTERM_MF_FAT	GO:0043167~ion binding	4	1.63265	0.912647	CDKN1A, MAP3K1, UBC, RHOA	16	4241	12983	0.765327	1	0.999999	100
Annotation Cluster 23	Enrichment Score: 1.0803156264224436
Category	Term	Count	%	p Value	Genes	List Total	Pop Hits	Pop Total	Fold Enrichment	Bonferroni	Benjamini	FDR
KEGG_PATHWAY	hsa04010:MAPK signaling pathway	4	1.63265	0.03387	EGFR, GRB2, MAP3K1, MYC	15	267	5085	5.07865	0.82749	0.117963	28.347
GOTERM_BP_FAT	GO:0065003~macromolecular complex assembly	4	1.63265	0.0637479	APOA1, GRB2, MAP3K1, MYC	20	665	13528	4.06857	1	0.375624	63.6667
GOTERM_BP_FAT	GO:0043933~macromolecular complex subunit organization	4	1.63265	0.074585	APOA1, GRB2, MAP3K1, MYC	20	710	13528	3.8107	1	0.40662	69.6199
GOTERM_BP_FAT	GO:0006461~protein complex assembly	3	1.22449	0.156944	GRB2, MAP3K1, MYC	20	505	13528	4.01822	1	0.645542	92.7489
GOTERM_BP_FAT	GO:0070271~protein complex biogenesis	3	1.22449	0.156944	GRB2, MAP3K1, MYC	20	505	13528	4.01822	1	0.645542	92.7489
Annotation Cluster 24	Enrichment Score: 1.078353284619966
Category	Term	Count	%	p Value	Genes	List Total	Pop Hits	Pop Total	Fold Enrichment	Bonferroni	Benjamini	FDR
GOTERM_BP_FAT	GO:0009611~response to wounding	4	1.63265	0.0363202	HDAC5, LYN, MAP3K1, FN1	20	530	13528	5.10491	1	0.265213	43.3702
GOTERM_BP_FAT	GO:0006954~inflammatory response	3	1.22449	0.0752347	HDAC5, LYN, FN1	20	325	13528	6.24369	1	0.406844	69.9461
GOTERM_BP_FAT	GO:0006952~defense response	3	1.22449	0.212997	HDAC5, LYN, FN1	20	615	13528	3.29951	1	0.749022	97.4815
Annotation Cluster 25	Enrichment Score: 0.9182808972684074
Category	Term	Count	%	p Value	Genes	List Total	Pop Hits	Pop Total	Fold Enrichment	Bonferroni	Benjamini	FDR
GOTERM_BP_FAT	GO:0051345~positive regulation of hydrolase activity	3	1.22449	0.0256857	EGFR, APOA1, MYC	20	179	13528	11.3363	1	0.210408	32.9647
GOTERM_BP_FAT	GO:0051336~regulation of hydrolase activity	3	1.22449	0.0801071	EGFR, APOA1, MYC	20	337	13528	6.02136	1	0.419627	72.2899
GOTERM_BP_FAT	GO:0008283~cell proliferation	3	1.22449	0.123716	EGFR, APOA1, MYC	20	436	13528	4.65413	1	0.562728	86.8646
SP_PIR_KEYWORDS	glycoprotein	4	1.63265	0.833849	EGFR, APOA1, MYC, FN1	20	4318	19235	0.890922	1	0.999581	100
Annotation Cluster 26	Enrichment Score: 0.642861292029524
Category	Term	Count	%	p Value	Genes	List Total	Pop Hits	Pop Total	Fold Enrichment	Bonferroni	Benjamini	FDR
GOTERM_CC_FAT	GO:0031988~membrane-bounded vesicle	4	1.63265	0.0372939	EGFR, APOA1, GRB2, FN1	18	568	12782	5.00078	0.99386	0.370605	35.9175
GOTERM_CC_FAT	GO:0031982~vesicle	4	1.63265	0.0563281	EGFR, APOA1, GRB2, FN1	18	670	12782	4.23947	0.999577	0.476599	49.278
GOTERM_CC_FAT	GO:0005615~extracellular space	4	1.63265	0.0594645	EGFR, APOA1, ISG15, FN1	18	685	12782	4.14663	0.999729	0.468431	51.217
GOTERM_CC_FAT	GO:0044421~extracellular region part	4	1.63265	0.130758	EGFR, APOA1, ISG15, FN1	18	960	12782	2.9588	1	0.690753	80.616
GOTERM_CC_FAT	GO:0016023~cytoplasmic membrane-bounded vesicle	3	1.22449	0.16457	EGFR, APOA1, FN1	18	550	12782	3.87333	1	0.737782	87.8186
GOTERM_CC_FAT	GO:0031410~cytoplasmic vesicle	3	1.22449	0.209154	EGFR, APOA1, FN1	18	642	12782	3.31828	1	0.792405	93.5904
SP_PIR_KEYWORDS	Secreted	4	1.63265	0.230078	EGFR, APOA1, ISG15, FN1	20	1689	19235	2.27768	1	0.817231	94.9597
SP_PIR_KEYWORDS	disease mutation	3	1.22449	0.473962	EGFR, APOA1, FN1	20	1591	19235	1.81348	1	0.972096	99.9351
GOTERM_CC_FAT	GO:0005576~extracellular region	4	1.63265	0.514128	EGFR, APOA1, ISG15, FN1	18	2010	12782	1.41316	1	0.985084	99.9786
SP_PIR_KEYWORDS	glycoprotein	4	1.63265	0.833849	EGFR, APOA1, MYC, FN1	20	4318	19235	0.890922	1	0.999581	100
SP_PIR_KEYWORDS	signal	3	1.22449	0.85569	EGFR, APOA1, FN1	20	3250	19235	0.887769	1	0.999693	100
UP_SEQ_FEATURE	signal peptide	3	1.22449	0.85835	EGFR, APOA1, FN1	20	3250	19113	0.882138	1	1	100
Annotation Cluster 27	Enrichment Score: 0.20025555720758376
Category	Term	Count	%	p Value	Genes	List Total	Pop Hits	Pop Total	Fold Enrichment	Bonferroni	Benjamini	FDR
GOTERM_CC_FAT	GO:0031090~organelle membrane	4	1.63265	0.174134	EGFR, SUMO1, LYN, GRB2	18	1096	12782	2.59165	1	0.740586	89.3548
SP_PIR_KEYWORDS	membrane	5	2.04082	0.910243	EGFR, SUMO1, LYN, RHOA, MSN	20	6256	19235	0.768662	1	0.99994	100
GOTERM_CC_FAT	GO:0016021~integral to membrane	3	1.22449	0.998549	EGFR, SUMO1, LYN	18	5297	12782	0.402177	1	1	100
GOTERM_CC_FAT	GO:0031224~intrinsic to membrane	3	1.22449	0.999005	EGFR, SUMO1, LYN	18	5485	12782	0.388393	1	1	100

## Sheet: KEGG_24 h
Table S6. KEGG (24 h).
Category	Term	Count	%	p Value	Genes	List Total	Pop Hits	Pop Total	Fold Enrichment	Bonferroni	Benjamini	FDR
KEGG_PATHWAY	hsa04012:ErbB signaling pathway	5	2.04082	7.02217e-05	EGFR, CDKN1A, GRB2, SHC1, MYC	15	87	5085	19.4828	0.00357503	0.00357503	0.0679116
KEGG_PATHWAY	hsa05214:Glioma	4	1.63265	0.000598621	EGFR, CDKN1A, GRB2, SHC1	15	63	5085	21.5238	0.0300772	0.010128	0.577602
KEGG_PATHWAY	hsa05220:Chronic myeloid leukemia	4	1.63265	0.000998188	CDKN1A, GRB2, SHC1, MYC	15	75	5085	18.08	0.0496577	0.0126525	0.961474
KEGG_PATHWAY	hsa04062:Chemokine signaling pathway	4	1.63265	0.0132025	LYN, GRB2, RHOA, SHC1	15	187	5085	7.25134	0.492272	0.0655349	12.0649
KEGG_PATHWAY	hsa04012:ErbB signaling pathway	5	2.04082	7.02217e-05	EGFR, CDKN1A, GRB2, SHC1, MYC	15	87	5085	19.4828	0.00357503	0.00357503	0.0679116
KEGG_PATHWAY	hsa05214:Glioma	4	1.63265	0.000598621	EGFR, CDKN1A, GRB2, SHC1	15	63	5085	21.5238	0.0300772	0.010128	0.577602
KEGG_PATHWAY	hsa04510:Focal adhesion	5	2.04082	0.00173555	EGFR, GRB2, RHOA, SHC1, FN1	15	201	5085	8.43284	0.084779	0.0146565	1.66638
KEGG_PATHWAY	hsa04722:Neurotrophin signaling pathway	4	1.63265	0.00423213	GRB2, MAP3K1, RHOA, SHC1	15	124	5085	10.9355	0.194504	0.030427	4.01981
KEGG_PATHWAY	hsa05213:Endometrial cancer	3	1.22449	0.00862897	EGFR, GRB2, MYC	15	52	5085	19.5577	0.357242	0.0479233	8.04203
KEGG_PATHWAY	hsa04062:Chemokine signaling pathway	4	1.63265	0.0132025	LYN, GRB2, RHOA, SHC1	15	187	5085	7.25134	0.492272	0.0655349	12.0649
KEGG_PATHWAY	hsa05210:Colorectal cancer	3	1.22449	0.021574	EGFR, GRB2, MYC	15	84	5085	12.1071	0.671204	0.0885269	19.0218
KEGG_PATHWAY	hsa04912:GnRH signaling pathway	3	1.22449	0.0287768	EGFR, GRB2, MAP3K1	15	98	5085	10.3776	0.774435	0.108233	24.6081
KEGG_PATHWAY	hsa04010:MAPK signaling pathway	4	1.63265	0.03387	EGFR, GRB2, MAP3K1, MYC	15	267	5085	5.07865	0.82749	0.117963	28.347
KEGG_PATHWAY	hsa05200:Pathways in cancer	7	2.85714	0.000132731	EGFR, CDKN1A, GRB2, RHOA, MYC, CDK2, FN1	15	328	5085	7.23476	0.00674687	0.00337915	0.12833
KEGG_PATHWAY	hsa05215:Prostate cancer	4	1.63265	0.00164087	EGFR, CDKN1A, GRB2, CDK2	15	89	5085	15.236	0.0803418	0.0166111	1.57612
KEGG_PATHWAY	hsa05219:Bladder cancer	3	1.22449	0.00569171	EGFR, CDKN1A, MYC	15	42	5085	24.2143	0.252564	0.0357342	5.37219
KEGG_PATHWAY	hsa04110:Cell cycle	3	1.22449	0.0449805	CDKN1A, MYC, CDK2	15	125	5085	8.136	0.904363	0.144851	35.9323
KEGG_PATHWAY	hsa04010:MAPK signaling pathway	4	1.63265	0.03387	EGFR, GRB2, MAP3K1, MYC	15	267	5085	5.07865	0.82749	0.117963	28.347
KEGG_PATHWAY	hsa04510:Focal adhesion	5	2.04082	0.00173555	EGFR, GRB2, RHOA, SHC1, FN1	15	201	5085	8.43284	0.084779	0.0146565	1.66638
KEGG_PATHWAY	hsa04810:Regulation of actin cytoskeleton	4	1.63265	0.0192063	EGFR, RHOA, MSN, FN1	15	215	5085	6.30698	0.62807	0.0859898	17.1061
KEGG_PATHWAY	hsa04010:MAPK signaling pathway	4	1.63265	0.03387	EGFR, GRB2, MAP3K1, MYC	15	267	5085	5.07865	0.82749	0.117963	28.347

## Sheet: David_Ori_48 h
Table S7. David (48 h).
Annotation Cluster 1	Enrichment Score: 2.8790433934853987
Category	Term	Count	%	p Value	Genes	List Total	Pop Hits	Pop Total	Fold Enrichment	Bonferroni	Benjamini	FDR
KEGG_PATHWAY	cfa05222:Small cell lung cancer	5	2.00803	2.65992e-05	TRAF2, NFKB1, CDK2, PIK3R2, FN1	13	78	4905	24.1864	0.00146191	0.00146191	0.0261595
KEGG_PATHWAY	cfa05200:Pathways in cancer	6	2.40964	0.000619309	EGFR, TRAF2, NFKB1, CDK2, PIK3R2, FN1	13	320	4905	7.07452	0.0334986	0.016892	0.607478
KEGG_PATHWAY	cfa05215:Prostate cancer	4	1.60643	0.00120399	EGFR, NFKB1, CDK2, PIK3R2	13	91	4905	16.585	0.0641119	0.0218443	1.17795
KEGG_PATHWAY	cfa05212:Pancreatic cancer	3	1.20482	0.0124155	EGFR, NFKB1, PIK3R2	13	71	4905	15.9426	0.496982	0.108207	11.5632
KEGG_PATHWAY	cfa04210:Apoptosis	3	1.20482	0.0163463	TRAF2, NFKB1, PIK3R2	13	82	4905	13.8039	0.596054	0.121462	14.965
Annotation Cluster 2	Enrichment Score: 0.3163122758075566
Category	Term	Count	%	p Value	Genes	List Total	Pop Hits	Pop Total	Fold Enrichment	Bonferroni	Benjamini	FDR
UP_SEQ_FEATURE	transmembrane region	3	1.20482	0.433572	VCAM1, APP, CAV1	5	229	658	1.72402	1	1	99.6004
GOTERM_CC_FAT	GO:0016021~integral to membrane	3	1.20482	0.464061	VCAM1, APP, CAV1	4	338	710	1.57544	1	1	99.4838
SP_PIR_KEYWORDS	transmembrane	3	1.20482	0.475869	VCAM1, APP, CAV1	5	315	847	1.61333	1	1	99.6112
GOTERM_CC_FAT	GO:0031224~intrinsic to membrane	3	1.20482	0.497884	VCAM1, APP, CAV1	4	354	710	1.50424	1	0.999954	99.7023
SP_PIR_KEYWORDS	membrane	3	1.20482	0.549776	VCAM1, APP, CAV1	5	351	847	1.44786	1	0.999996	99.8946

## Sheet: KEGG_48h
Table S8. KEGG (48 h).
Category	Term	Count	%	p Value	Genes	List Total	Pop Hits	Pop Total	Fold Enrichment	Bonferroni	Benjamini	FDR
KEGG_PATHWAY	cfa05222:Small cell lung cancer	5	2.00803	2.65992e-05	TRAF2, NFKB1, CDK2, PIK3R2, FN1	13	78	4905	24.1864	0.00146191	0.00146191	0.0261595
KEGG_PATHWAY	cfa05200:Pathways in cancer	6	2.40964	0.000619309	EGFR, TRAF2, NFKB1, CDK2, PIK3R2, FN1	13	320	4905	7.07452	0.0334986	0.016892	0.607478
KEGG_PATHWAY	cfa05215:Prostate cancer	4	1.60643	0.00120399	EGFR, NFKB1, CDK2, PIK3R2	13	91	4905	16.585	0.0641119	0.0218443	1.17795
KEGG_PATHWAY	cfa05212:Pancreatic cancer	3	1.20482	0.0124155	EGFR, NFKB1, PIK3R2	13	71	4905	15.9426	0.496982	0.108207	11.5632
KEGG_PATHWAY	cfa04210:Apoptosis	3	1.20482	0.0163463	TRAF2, NFKB1, PIK3R2	13	82	4905	13.8039	0.596054	0.121462	14.965
