# Supplementary material for: Temporal Genetic Modifications after Controlled Cortical Impact—Understanding Traumatic Brain Injury through a Systematic Network Approach
Source: Int J Mol Sci. 2016 Feb 6;17(2):216. doi: 10.3390/ijms17020216 (PMC4783948; doi:10.3390/ijms17020216)
Supplement: Supplementary file 1 [file ijms-17-00216-s001.zip › ijms-105508-Supplementary Materials/ijms-105508-Supplementary-S5.xls]

## Sheet: Pathway Maps
Table S9. Pathway Maps
Enrichment analysis report
Enrichment by Pathway Maps					Common				Similar				Unique for 4h_p0.05				Unique for 8h_p0.05				Unique for 24h_p0.05				Unique for 72h_p0.05
#	Maps	Total	p Value	Min FDR	p value	FDR	In Data	Genes from Active Data	p value	FDR	In Data	Genes from Active Data	p value	FDR	In Data	Genes from Active Data	p value	FDR	In Data	Genes from Active Data	p value	FDR	In Data	Genes from Active Data	p value	FDR	In Data	Genes from Active Data
1	DNA damage_ATM/ATR regulation of G1/S checkpoint	32	1.68351e-06	8.88578e-05	1.68351e-06	8.88578e-05	3	c-Myc, p21, Ubiquitin	0.00981225	0.026307	2	NF-kB, CDK2	0.0657553	0.128405	1	Brca1	0.00560189	0.024305	2	I-kB, MDM2	0.0075731	0.0147558	2	NF-kB, PCNA	1	1
2	Cell cycle_ESR1 regulation of G1/S transition	33	1.8512e-06	3.84848e-06	1.8512e-06	8.88578e-05	3	c-Myc, p21, Ubiquitin	1.56435e-05	0.000231673	4	c-Jun/c-Fos, ATF-2/c-Jun, c-Jun, CDK2	1	1			8.58397e-08	3.84848e-06	5	c-Jun/c-Fos, Cullin 1, c-Fos, Cul1/Rbx1 E3 ligase, SP1	0.127623	0.155617	1	ERK2 (MAPK1)	1	1
3	DNA damage_Role of SUMO in p53 regulation	17	7.87333e-05	0.0018896	7.87333e-05	0.0018896	2	Ubiquitin, SUMO-1	1	1			1	1			0.0584357	0.132094	1	MDM2	1	1			1	1
4	CFTR translational fidelity (class I mutations)	17	7.87333e-05	0.0018896	7.87333e-05	0.0018896	2	Large 60S subunit, Small 40S subunit	1	1			1	1			1	1			0.0678568	0.100588	1	Large 60S subunit	1	1
5	DNA damage_ATM / ATR regulation of G2 / M checkpoint	26	0.000187485	0.00267251	0.000187485	0.00267251	2	p21, Ubiquitin	0.11567	0.168099	1	CDK1 (p34)	0.0537459	0.128405	1	Brca1	1	1			1	1			1	1
6	Translation _Regulation of translation initiation	27	0.000202404	0.00267251	0.000202404	0.00267251	2	Large 60S subunit, Small 40S subunit	1	1			1	1			0.0912528	0.16929	1	eIF6 (ITGB4BP)	0.10566	0.138679	1	Large 60S subunit	0.114199	0.207092	1	RACK1
7	Cell cycle_Role of SCF complex in cell cycle regulation	29	0.000233936	0.00219654	0.000233936	0.00267251	2	p21, Ubiquitin	0.000324891	0.00219654	3	CDK1 (p34), CDK2, NEDD8	1	1			0.00461563	0.021407	2	Cullin 1, Cul1/Rbx1 E3 ligase	1	1			1	1
8	Proteolysis_Putative SUMO-1 pathway	29	0.000233936	0.00267251	0.000233936	0.00267251	2	Ubiquitin, SUMO-1	0.00810353	0.0229109	2	NF-kB, c-Jun	1	1			0.00461563	0.021407	2	MDM2, NFKBIA	0.11304	0.145337	1	NF-kB	1	1
9	DNA damage_Brca1 as a transcription regulator	30	0.000250548	0.00267251	0.000250548	0.00267251	2	c-Myc, p21	1	1			0.0617682	0.128405	1	Brca1	0.10088	0.172391	1	SP1	0.116708	0.146078	1	PCNA	1	1
10	Cell cycle_Regulation of G1/S transition (part 1)	38	0.000403636	0.00322463	0.000403636	0.00322463	2	p21, Ubiquitin	0.164551	0.200688	1	CDK2	0.0776207	0.128405	1	Brca1	0.00783626	0.0296895	2	Cul1/Rbx1 E3 ligase, SP1	1	1			0.012383	0.0563901	2	TGF-β 1, PP2A catalytic

## Sheet: GO Processes
Table S10. GO Processes
Enrichment analysis report
Enrichment by GO Processes					Common				Similar				Unique for 4h_p0.05				Unique for 8h_p0.05				Unique for 24h_p0.05				Unique for 72h_p0.05
#	Processes	Total	p Value	Min FDR	p Value	FDR	In Data	Genes from Active Data	p Value	FDR	In Data	Genes from Active Data	p Value	FDR	In Data	Genes from Active Data	p Value	FDR	In Data	Genes from Active Data	p Value	FDR	In Data	Genes from Active Data	p Value	FDR	In Data	Genes from Active Data
1	intracellular transport of viral material	15	1.30976e-20	5.8808e-18	1.30976e-20	5.8808e-18	7	RPS27A, Ubiquitin, Large 60S subunit, UBC, Small 40S subunit, UBB, RP40	1	1			1	1			1	1			1	1			1	1
2	egress of virus within host cell	15	1.30976e-20	5.8808e-18	1.30976e-20	5.8808e-18	7	RPS27A, Ubiquitin, Large 60S subunit, UBC, Small 40S subunit, UBB, RP40	1	1			1	1			1	1			1	1			1	1
3	viral assembly, maturation, egress, and release	18	6.47333e-20	1.93768e-17	6.47333e-20	1.93768e-17	7	RPS27A, Ubiquitin, Large 60S subunit, UBC, Small 40S subunit, UBB, RP40	1	1			1	1			1	1			1	1			1	1
4	Notch receptor processing	27	1.803e-18	4.04773e-16	1.803e-18	4.04773e-16	7	RPS27A, Ubiquitin, Large 60S subunit, UBC, Small 40S subunit, UBB, RP40	1	1			1	1			1	1			1	1			1	1
5	G1 phase of mitotic cell cycle	76	8.94349e-18	8.81309e-16	8.94349e-18	8.81309e-16	8	RPS27A, p21, Ubiquitin, Large 60S subunit, UBC, Small 40S subunit, UBB, RP40	1	1			1	1			4.81438e-05	0.000363665	4	Cullin 1, MDM2, Cul1/Rbx1 E3 ligase, SCF (Fbx4/aB Crystallin) E3 ligase	6.32311e-05	0.000175808	4	Large 60S subunit, NeuroD/E47, E2A, MYOD/E47	1	1
6	signal transduction involved in mitotic cell cycle checkpoint	78	1.11173e-17	8.81309e-16	1.11173e-17	8.81309e-16	8	RPS27A, p21, Ubiquitin, Large 60S subunit, UBC, Small 40S subunit, UBB, RP40	1	1			1	1			1	1			1	1			1	1
7	DNA damage response, signal transduction by p53 class mediator resulting in cell cycle arrest	78	1.11173e-17	8.81309e-16	1.11173e-17	8.81309e-16	8	RPS27A, p21, Ubiquitin, Large 60S subunit, UBC, Small 40S subunit, UBB, RP40	1	1			1	1			1	1			1	1			1	1
8	signal transduction involved in mitotic cell cycle G1/S checkpoint	78	1.11173e-17	8.81309e-16	1.11173e-17	8.81309e-16	8	RPS27A, p21, Ubiquitin, Large 60S subunit, UBC, Small 40S subunit, UBB, RP40	1	1			1	1			1	1			1	1			1	1
9	signal transduction involved in mitotic cell cycle G1/S transition DNA damage checkpoint	78	1.11173e-17	8.81309e-16	1.11173e-17	8.81309e-16	8	RPS27A, p21, Ubiquitin, Large 60S subunit, UBC, Small 40S subunit, UBB, RP40	1	1			1	1			1	1			1	1			1	1
10	signal transduction involved in G1/S transition checkpoint	79	1.23679e-17	8.81309e-16	1.23679e-17	8.81309e-16	8	RPS27A, p21, Ubiquitin, Large 60S subunit, UBC, Small 40S subunit, UBB, RP40	1	1			1	1			1	1			1	1			1	1

## Sheet: Process Networks
Tbale S11. Process Networks
Enrichment analysis report
Enrichment by Process Networks					Common				Similar				Unique for 4h_p0.05				Unique for 8h_p0.05				Unique for 24h_p0.05				Unique for 72h_p0.05
#	Networks	Total	p Value	Min FDR	p Value	FDR	In Data	Genes from Active Data	p Value	FDR	In Data	Genes from Active Data	p Value	FDR	In Data	Genes from Active Data	p Value	FDR	In Data	Genes from Active Data	p Value	FDR	In Data	Genes from Active Data	p Value	FDR	In Data	Genes from Active Data
1	Translation_Translation initiation	171	9.15682e-05	0.00477638	9.15682e-05	0.00477638	4	RPS27A, Large 60S subunit, Small 40S subunit, RP40	1	1			1	1			0.656582	0.713436	1	eIF6 (ITGB4BP)	0.239244	0.289268	2	RPLP0, Large 60S subunit	0.648111	0.698396	1	RACK1
2	Cell cycle_G2-M	206	0.000188688	0.00477638	0.000188688	0.00477638	4	c-Myc, p21, Ubiquitin, UBC	0.0693858	0.119344	4	EGFR, Shc, CDK1 (p34), NEDD8	0.0214049	0.0616528	3	Brca1, 14-3-3, 14-3-3 beta/alpha	0.132641	0.218857	3	Aurora-B, Cul1/Rbx1 E3 ligase, SP1	0.00491417	0.00883222	5	GRB2, ERK1 (MAPK3), CHIP, ERK1/2, Myosin II	0.00748802	0.0301936	5	CDC20, APC/CDC20 complex, Aurora-A, 14-3-3 epsilon, 14-3-3
3	Translation_Elongation-Termination	233	0.000303262	0.00477638	0.000303262	0.00477638	4	RPS27A, Large 60S subunit, Small 40S subunit, RP40	1	1			1	1			0.76842	0.76842	1	eIF6 (ITGB4BP)	0.133102	0.173555	3	RPLP0, Large 60S subunit, PI3K reg class IA	0.164038	0.225327	3	PI3K reg class IA, eEF2, RACK1
4	Translation_Elongation-Termination_test	233	0.000303262	0.00477638	0.000303262	0.00477638	4	RPS27A, Large 60S subunit, Small 40S subunit, RP40	1	1			1	1			0.76842	0.76842	1	eIF6 (ITGB4BP)	0.133102	0.173555	3	RPLP0, Large 60S subunit, PI3K reg class IA	0.164038	0.225327	3	PI3K reg class IA, eEF2, RACK1
5	DNA damage_Checkpoint	124	0.00075977	0.00681478	0.00075977	0.0095731	3	c-Myc, p21, Ubiquitin	0.00232442	0.00681478	5	ATF-2/c-Jun, NF-kB, CDK1 (p34), c-Jun, CDK2	0.00539587	0.0300627	3	Brca1, 14-3-3, 14-3-3 beta/alpha	0.0403153	0.0967568	3	I-kB, MDM2, GADD45 gamma	0.00444095	0.00809104	4	NF-kB, ERK1 (MAPK3), ERK1/2, PCNA	0.0063183	0.0263262	4	APC/CDC20 complex, 14-3-3 epsilon, Histone H2AX, 14-3-3
6	Cell cycle_G1-S	163	0.00167951	0.00422027	0.00167951	0.0176349	3	c-Myc, p21, Ubiquitin	0.00745507	0.0178093	5	JAB1, CDK1 (p34), CDK2, COP9 signalosome, NEDD8	0.00115246	0.0127209	4	Brca1, HDAC3, 14-3-3, 14-3-3 beta/alpha	0.000441977	0.00422027	6	I-kB, Cullin 1, SERTAD1, MDM2, NFKBIA, Cul1/Rbx1 E3 ligase	0.594321	0.608036	1	PCNA	0.074083	0.151526	3	UHRF1, 14-3-3 epsilon, 14-3-3
7	Development_Regulation of telomere length	53	0.00284347	0.0255912	0.00284347	0.0255912	2	c-Myc, p21	0.331984	0.424019	1	CDK2	0.0103545	0.0475089	2	HSP90, Brca1	0.279997	0.393187	1	SP1	1	1			0.0401517	0.0971336	2	TRF2, PP2A catalytic
8	Signal transduction_ESR1-nuclear pathway	216	0.00375341	0.000773768	0.00375341	0.0295581	3	c-Myc, p21, Ubiquitin	0.000191942	0.000773768	8	NF-kB1 (p105), EGFR, JAB1, Shc, c-Jun, CDK2, NF-kB1 (p50), RelA (p65 NF-kB subunit)	0.131306	0.182891	2	Brca1, BAF	0.0429411	0.0994425	4	PPAR-gamma, CYP19, c-Fos, SP1	0.0292069	0.0436463	4	GRB2, ERK2 (MAPK1), PI3K reg class IA, ERK1/2	0.13976	0.212907	3	PI3K reg class IA, Caveolin-1, SOCS3
9	Signal transduction_NOTCH signaling	236	0.00481869	2.7298e-08	0.00481869	0.0337309	3	c-Myc, p21, Ubiquitin	8.49413e-06	5.21782e-05	10	NF-kB, NF-kB1 (p105), EGFR, STAT3, Shc, NF-kB p65/p65, c-Jun, HDAC2, NF-kB1 (p50), RelA (p65 NF-kB subunit)	1	1			0.00299916	0.0164954	6	I-kB, Amphiregulin, NFKBIA, c-Fos, Cul1/Rbx1 E3 ligase, Beta-catenin	2.25773e-09	2.7298e-08	12	GRB2, NF-kB, ERK2 (MAPK1), MEKK1(MAP3K1), PI3K reg class IA (p85-alpha), ERK1 (MAPK3), PI3K reg class IA (p85), PI3K reg class IA, E2A, ERK1/2, c-Rel (NF-kB subunit), PCNA	0.0523794	0.119044	4	TGF-beta, PI3K reg class IA (p85), PI3K reg class IA, TGF-beta 1
10	Development_Hedgehog signaling	254	0.00592154	0.0373057	0.00592154	0.0373057	3	c-Myc, p21, Ubiquitin	0.300893	0.396074	3	BMI-1, Shc, PRC1 complex	0.5328	0.5328	1	HSP90	0.0191067	0.0560463	5	Cullin 1, Cul1/Rbx1 E3 ligase, SP1, Androgen receptor, Beta-catenin	0.0484299	0.0685232	4	GRB2, ERK1 (MAPK3), E2A, RhoA	1	1

## Sheet: Diseases (by Biomarkers)
Table S12. Diseases (by Biomarkers)
Enrichment analysis report
Enrichment by Diseases (by Biomarkers)					Common				Similar				Unique for 4h_p0.05				Unique for 8h_p0.05				Unique for 24h_p0.05				Unique for 72h_p0.05
#	Diseases	Total	p Value	Min FDR	p Value	FDR	In Data	Genes from Active Data	p Value	FDR	In Data	Genes from Active Data	p Value	FDR	In Data	Genes from Active Data	p Value	FDR	In Data	Genes from Active Data	p Value	FDR	In Data	Genes from Active Data	p Value	FDR	In Data	Genes from Active Data
1	Cleft Palate	78	3.81772e-07	7.34847e-05	3.81772e-07	7.34847e-05	4	Ubiquitin, Large 60S subunit, UBB, SUMO-1	1	1			1	1			1	1			1	1			0.237385	0.256838	1	TGF-beta
2	Jaw Abnormalities	80	4.22932e-07	7.34847e-05	4.22932e-07	7.34847e-05	4	Ubiquitin, Large 60S subunit, UBB, SUMO-1	1	1			1	1			1	1			1	1			0.242682	0.261564	1	TGF-beta
3	Maxillofacial Abnormalities	84	5.15079e-07	7.34847e-05	5.15079e-07	7.34847e-05	4	Ubiquitin, Large 60S subunit, UBB, SUMO-1	1	1			1	1			1	1			1	1			0.253169	0.272172	1	TGF-beta
4	Mouth Abnormalities	114	1.75836e-06	0.000188145	1.75836e-06	0.000188145	4	Ubiquitin, Large 60S subunit, UBB, SUMO-1	1	1			1	1			1	1			0.0117452	0.0180394	3	Large 60S subunit, MyHC, Myosin II	0.327419	0.347138	1	TGF-beta
5	Stomatognathic System Abnormalities	130	2.9725e-06	0.000212039	2.9725e-06	0.000212039	4	Ubiquitin, Large 60S subunit, UBB, SUMO-1	1	1			1	1			1	1			0.0166839	0.0247169	3	Large 60S subunit, MyHC, Myosin II	0.0742331	0.0971005	2	TGF-beta, TGF-beta 1
6	Jaw Diseases	130	2.9725e-06	0.000212039	2.9725e-06	0.000212039	4	Ubiquitin, Large 60S subunit, UBB, SUMO-1	0.490547	0.516692	1	EGFR	0.206357	0.253941	1	SUMO-3	1	1			0.00204403	0.00390147	4	ERK2 (MAPK1), ERK1 (MAPK3), Large 60S subunit, ERK1/2	0.364015	0.382578	1	TGF-beta
7	Genomic Instability	178	1.03629e-05	0.000105219	1.03629e-05	0.000633618	4	c-Myc, p21, Ubiquitin, UBB	0.0638647	0.0870406	3	NuRD complex, CDK2, FAT10	1.24733e-05	0.000105219	5	PBAF, Brca1, BAF, Brca1/Bard1, 14-3-3	0.00549602	0.010992	4	Nucleophosmin, MDM2, Cul1/Rbx1 E3 ligase, Beta-catenin	0.168495	0.189044	2	RPA, PCNA	0.00035508	0.0016577	5	Histone H2, Histone H2A, Aurora-A, Histone H2AX, 14-3-3
8	Idiopathic Interstitial Pneumonias	204	1.77545e-05	0.000911455	1.77545e-05	0.000911455	4	p21, Ubiquitin, UBC, UBB	0.654018	0.666874	1	Fibronectin	1	1			0.00882744	0.015972	4	MDM2, ICAM1, sICAM1, Beta-catenin	1	1			0.0332757	0.0546963	3	TGF-beta, TGF-beta 1, Caveolin-1
9	Craniofacial Abnormalities	208	1.91661e-05	0.000911455	1.91661e-05	0.000911455	4	Ubiquitin, Large 60S subunit, UBB, SUMO-1	0.661201	0.671722	1	Histone deacetylase class II	0.0516317	0.0820054	2	Brca1, Brca1/Bard1	1	1			0.00166499	0.00325913	5	Large 60S subunit, HDL, SHP-2, Large apoE-rich HDL, PP2C	0.516319	0.526284	1	TGF-beta
10	Red-Cell Aplasia, Pure	11	3.55821e-05	0.00138447	3.55821e-05	0.00138447	2	Large 60S subunit, Small 40S subunit	1	1			1	1			1	1			0.0447281	0.0577947	1	Large 60S subunit	1	1

## Sheet: Info
Table S13. Information.
General
Date	13-JUL-15 02.46.49.000 PM
Server	pathway.cgu.edu.tw
Version	6.13.61585
Name	kevintmu
Login	kevintmu
Workflow Settings
Type	Compare Experiments
Signals	both
Active Data
Name	Type	Size		Threshold	0
8h_p0.05	General	50		P-value	1
72h_p0.05	General	59
24h_p0.05	General	48
4h_p0.05	General	27
